# Supplementary material
Source: PubMed Central journal article supplement (PMC6646005)
Supplement: ao8b00983_si_001.pdf [file ao8b00983_si_001.pdf]

# Supporting Information For

## Synthesis of Unsaturated Precursors for Parahydrogen Induced Polarization and Molecular Imaging of 1-<sup>13</sup>C-acetates and 1-<sup>13</sup>C-pyruvates via Side Arm Hydrogenation

Nikita V. Chukanov,<sup>[a, b]</sup> Oleg G. Salnikov,<sup>[a, b]</sup> Roman V. Shchepin,<sup>[c]</sup> Kirill V. Kovtunov,<sup>[a, b]</sup> Igor V. Koptug,<sup>[a, b]</sup> and Eduard Y. Chekmenev\*<sup>[c, d, e]</sup>

[a] International Tomography Center, SB RAS, Novosibirsk, Institutskaya Street 3A, 630090, Russia

[b] Novosibirsk State University, Novosibirsk, Pirogova Street 2, 630090, Russia

[c] Vanderbilt University Institute of Imaging Science (VUIIS), Department of Radiology, Department of Biomedical Engineering, and Vanderbilt-Ingram Cancer Center (VICC), Vanderbilt University, Nashville, Tennessee 37232-2310, United States

[d] Russian Academy of Sciences, Moscow, Leninskiy Prospekt 14, 119991, Russia

[e] Department of Chemistry, Integrative Biosciences (Ibio), Wayne State University, Karmanos Cancer Institute (KCI), Detroit, MI, 48202, United States

# Table of Contents

1. Additional Figures (S1-S29):  $^1\text{H}$  NMR and  $^{13}\text{C}$  NMR spectra of acetates and pyruvates in  $\text{CDCl}_3$ ... S-3
2. Additional Figures (S30-S39):  $^1\text{H}$  NMR and  $^{13}\text{C}$  NMR spectra of pyruvates in  $\text{CD}_3\text{OD}$ .....S-18
3. Additional Figures (S40-S57):  $^1\text{H}$  NMR and  $^{13}\text{C}$  NMR spectra of neat acetates and pyruvates. ....S-23

1. Additional Figures (S1-S29):  $^1\text{H}$  NMR and  $^{13}\text{C}$  NMR spectra of acetates and pyruvates in  $\text{CDCl}_3$ .

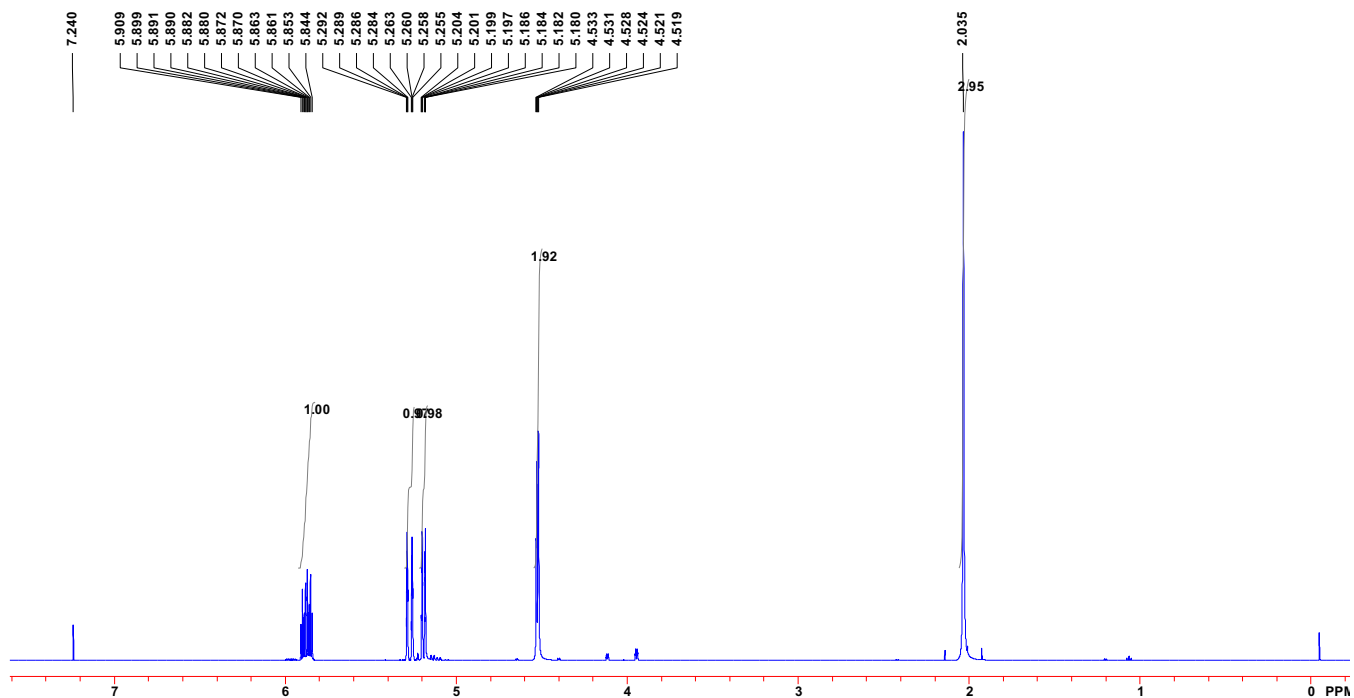

Figure S1.  $^1\text{H}$  NMR spectroscopy of allyl acetate 5a

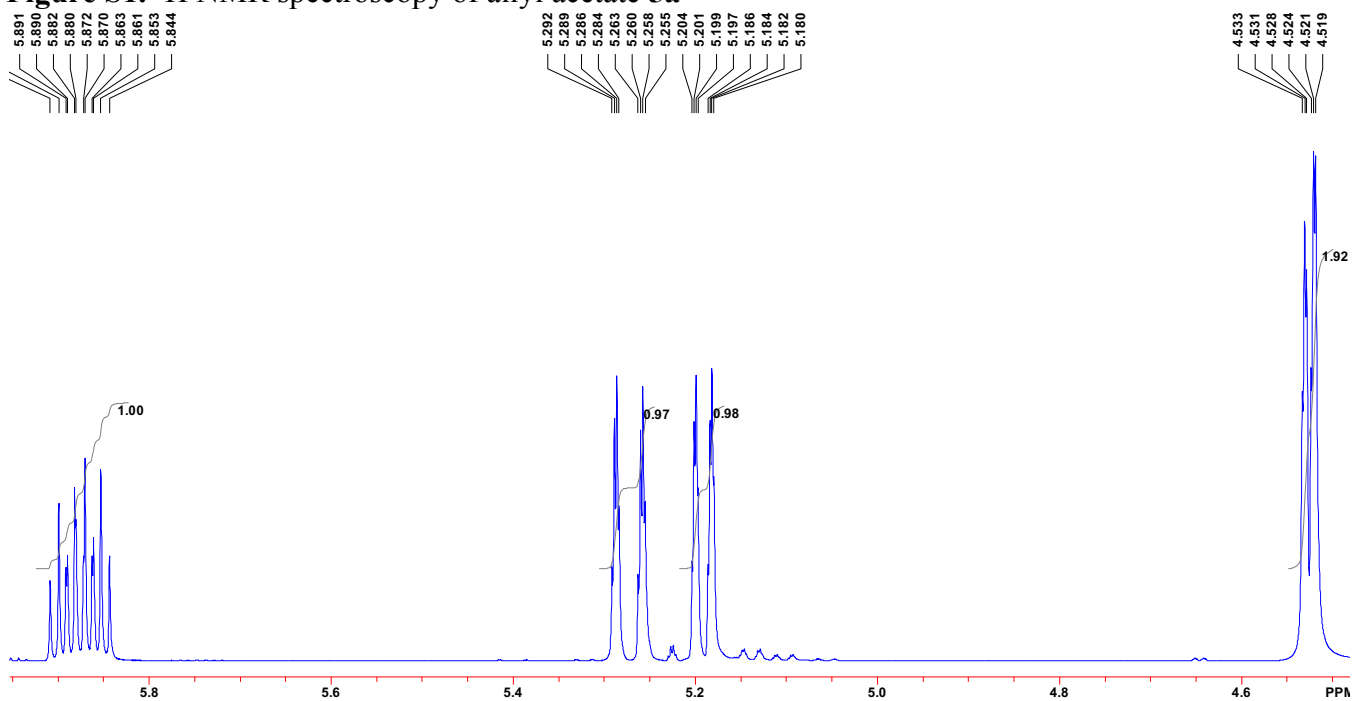

Figure S2.  $^1\text{H}$  NMR spectroscopy of allyl acetate 5a

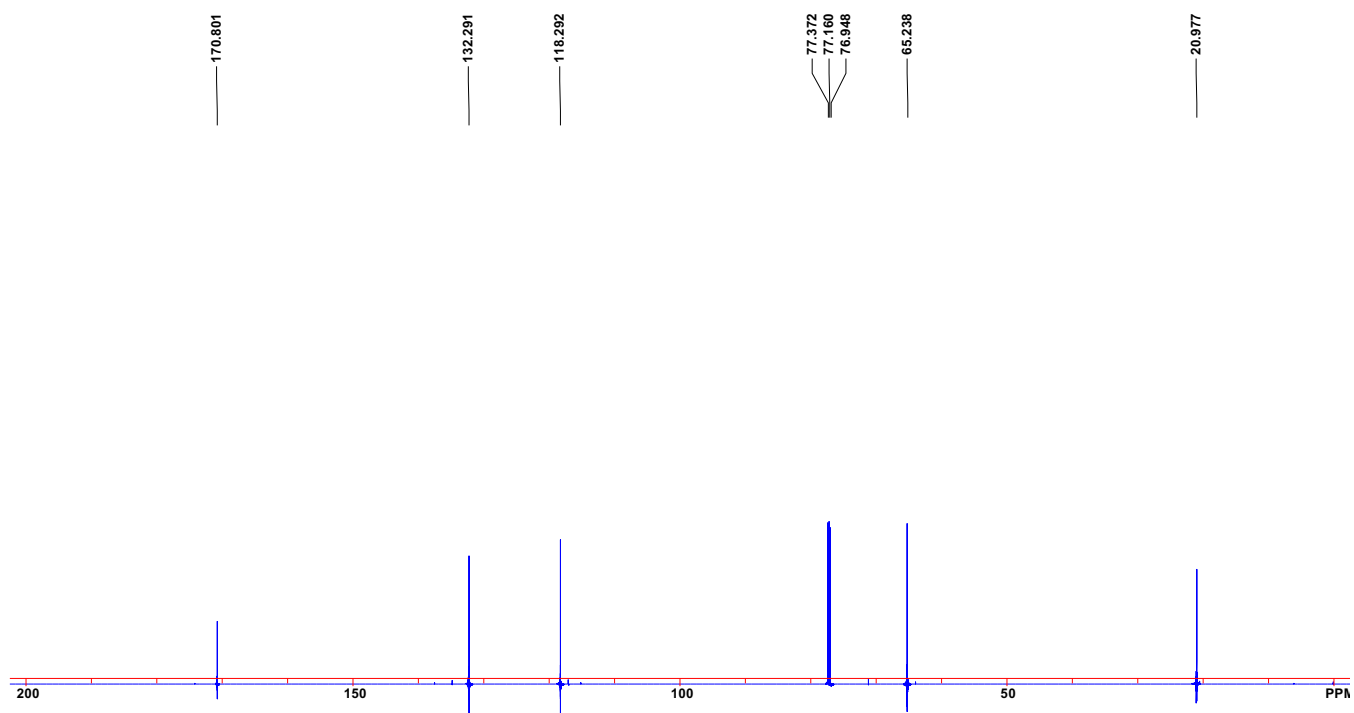

**Figure S3.**  $^{13}\text{C}$  NMR spectroscopy of allyl acetate **5a**

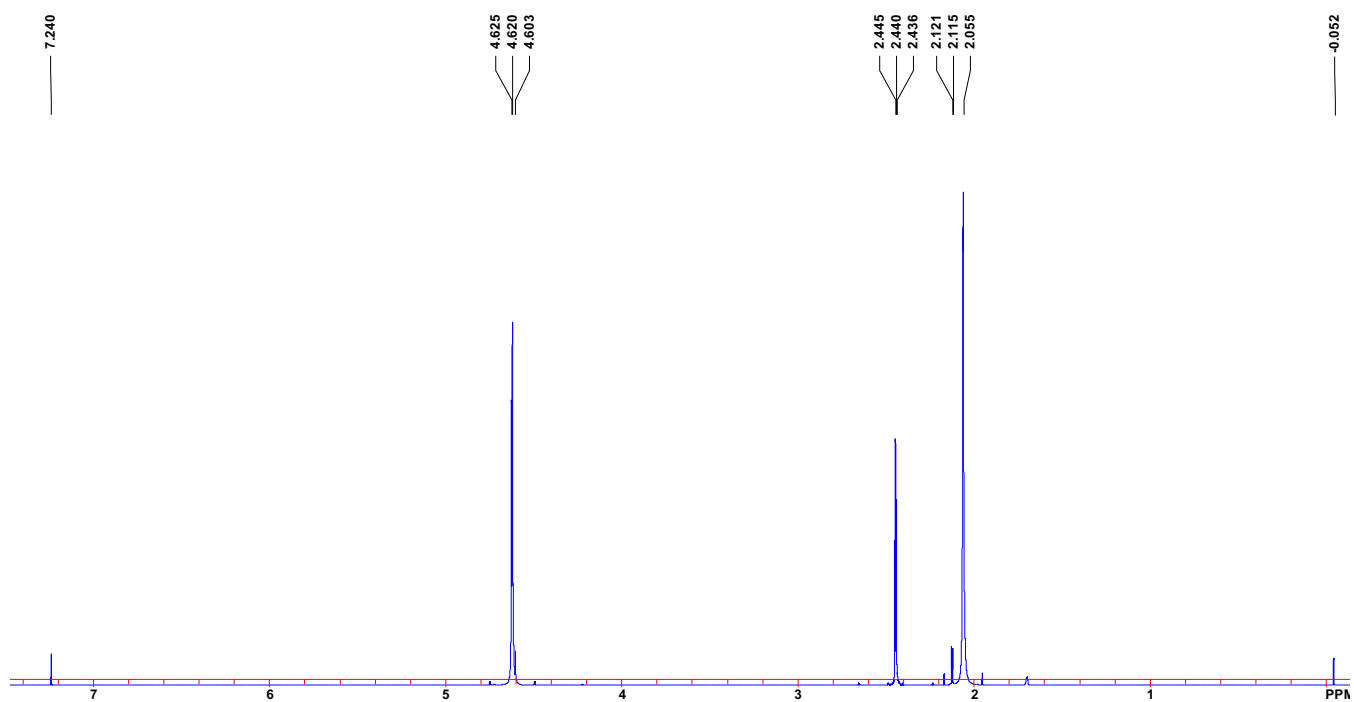

**Figure S4.**  $^1\text{H}$  NMR spectroscopy of propargyl acetate **6a**

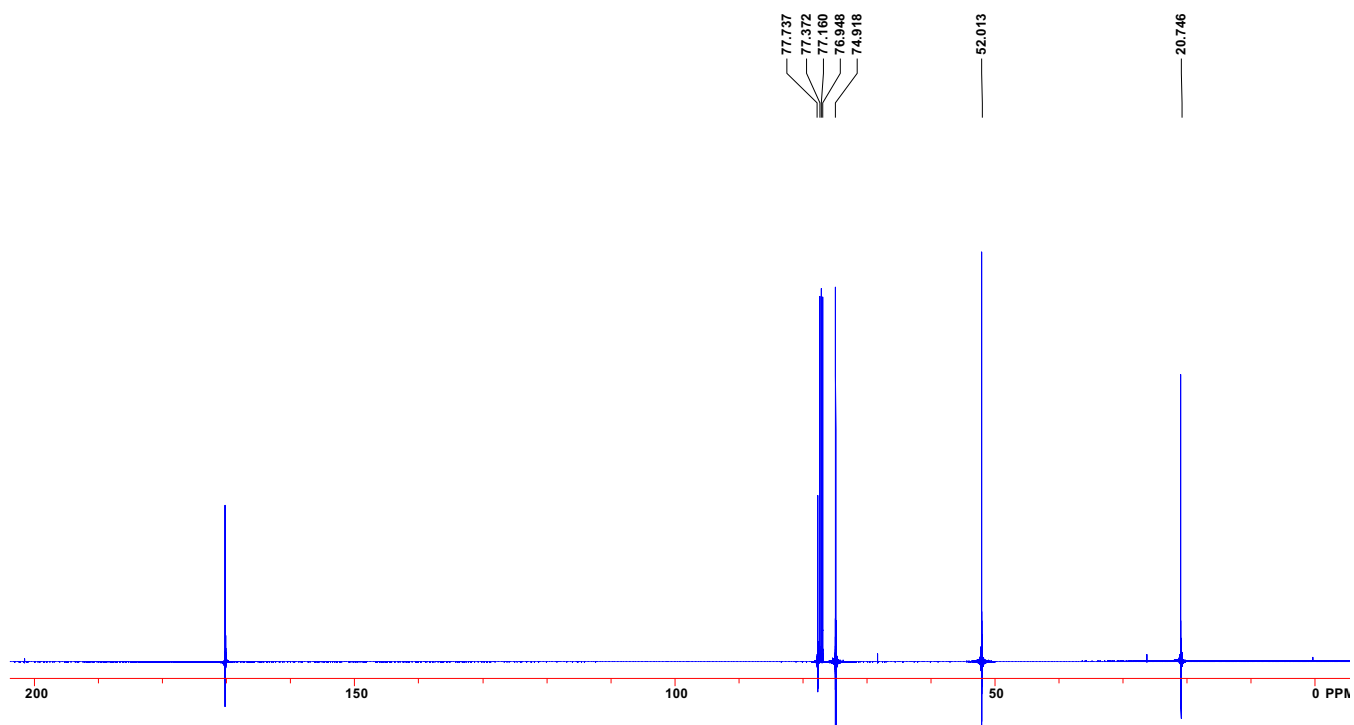

Figure S5.  $^{13}\text{C}$  NMR spectroscopy of propargyl acetate **6a**

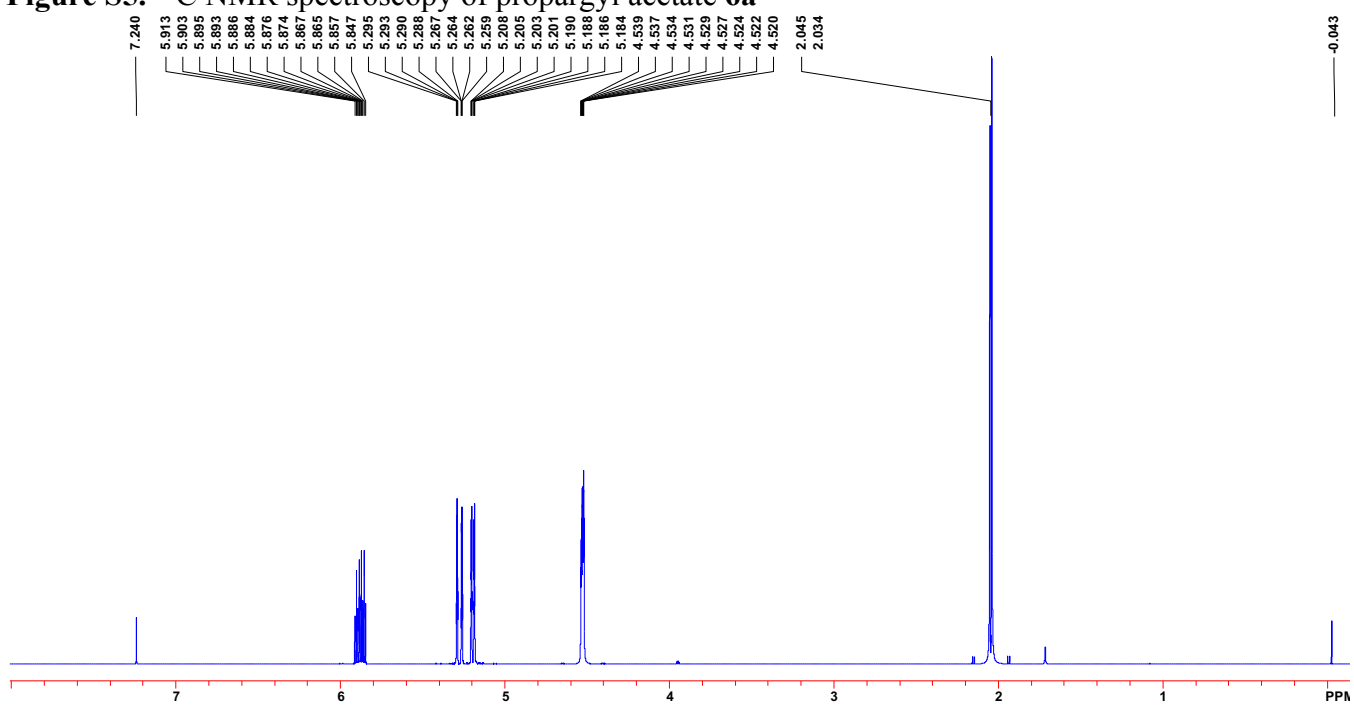

Figure S6.  $^1\text{H}$  NMR spectroscopy of allyl acetate- $1\text{-}^{13}\text{C}$  **5b**

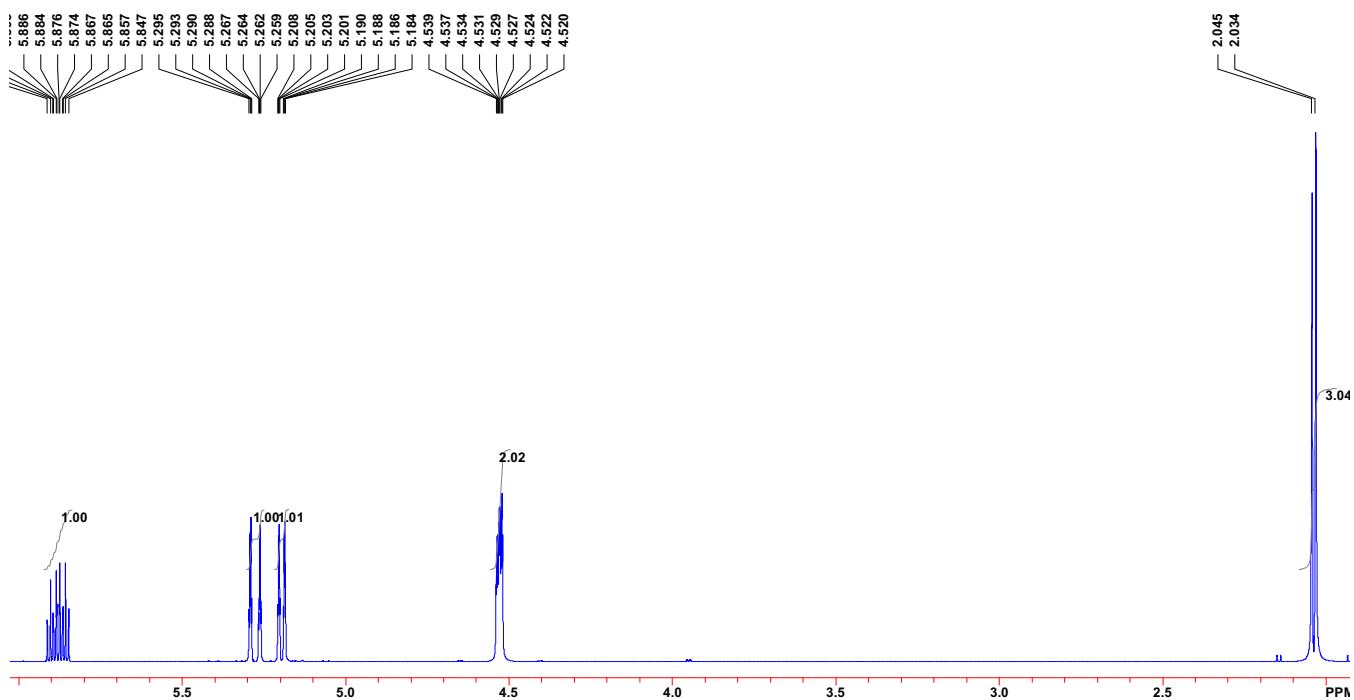

Figure S7.  $^1\text{H}$  NMR spectroscopy of allyl acetate- $1\text{-}^{13}\text{C}$  **5b**

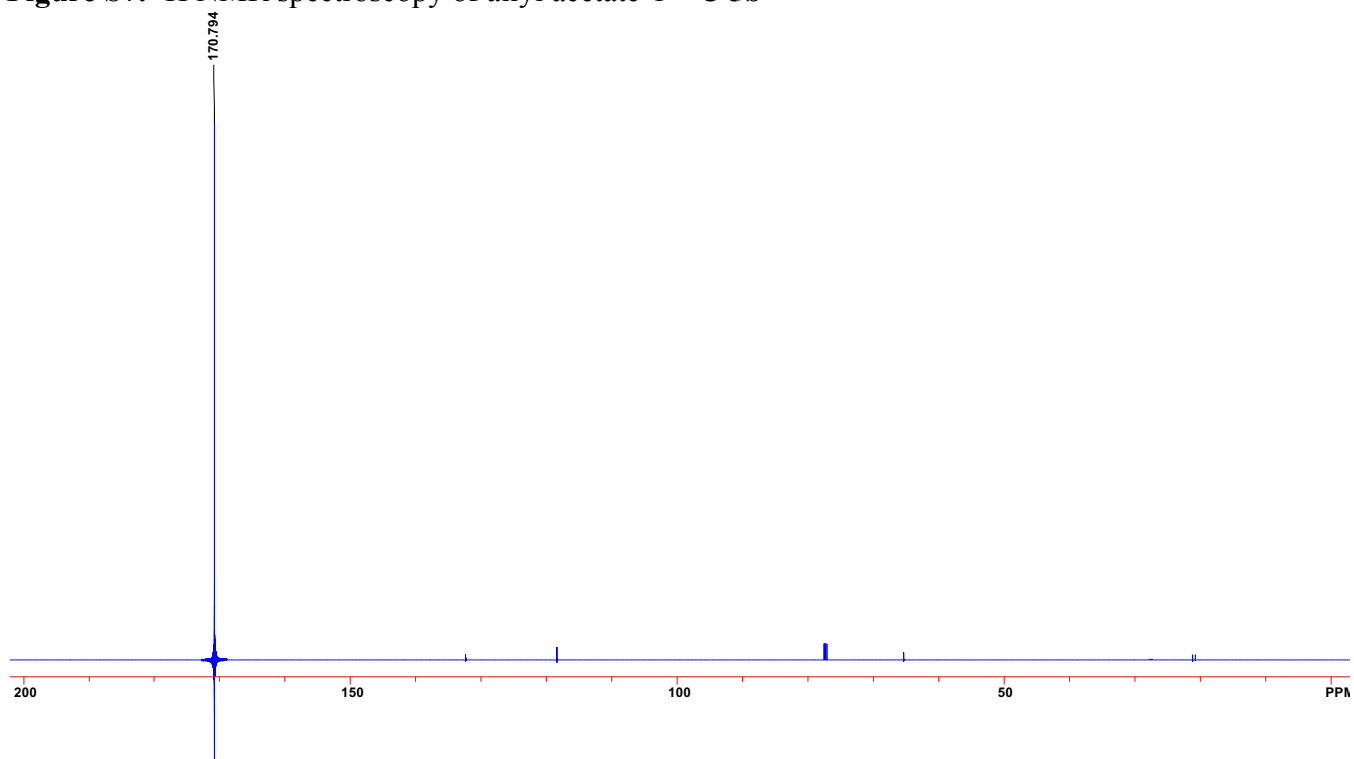

Figure S8.  $^{13}\text{C}$  NMR spectroscopy of allyl acetate- $1\text{-}^{13}\text{C}$  **5b**

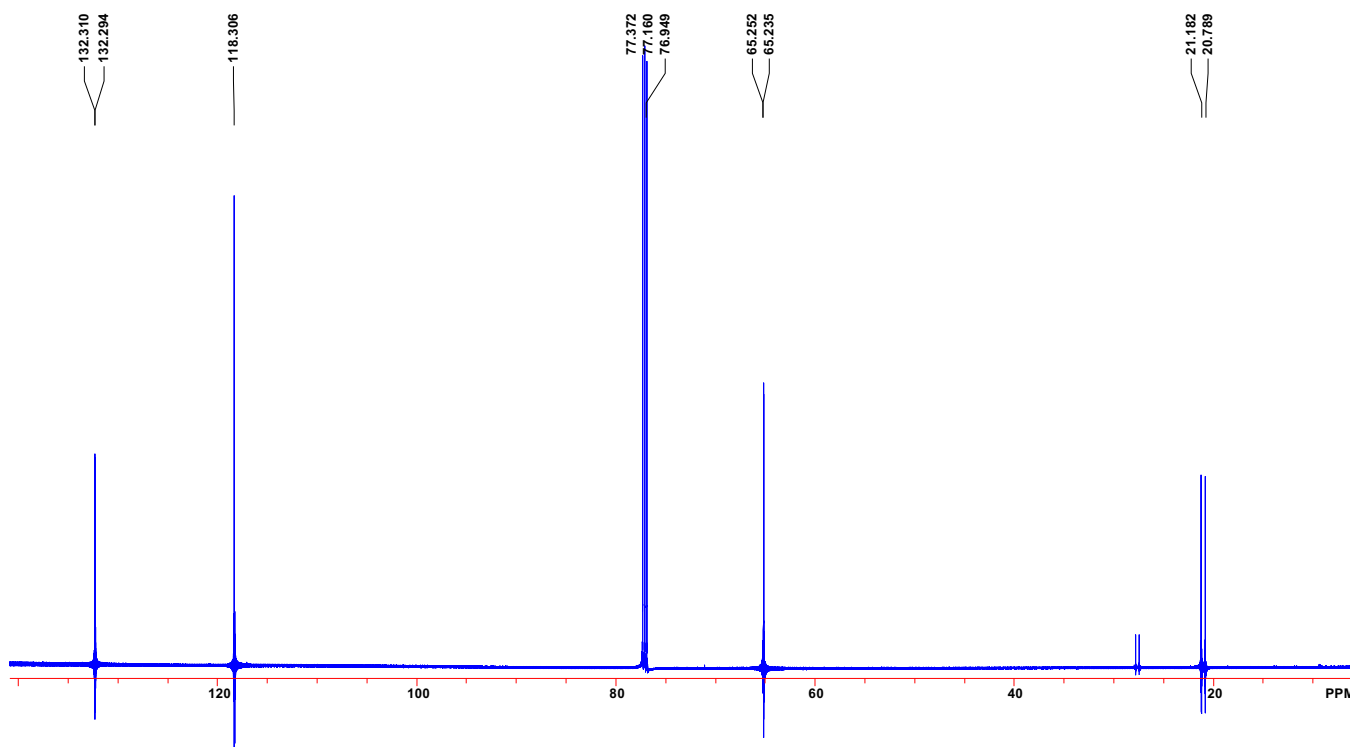

Figure S9.  $^{13}\text{C}$  NMR spectroscopy of allyl acetate-1- $^{13}\text{C}$  **5b**

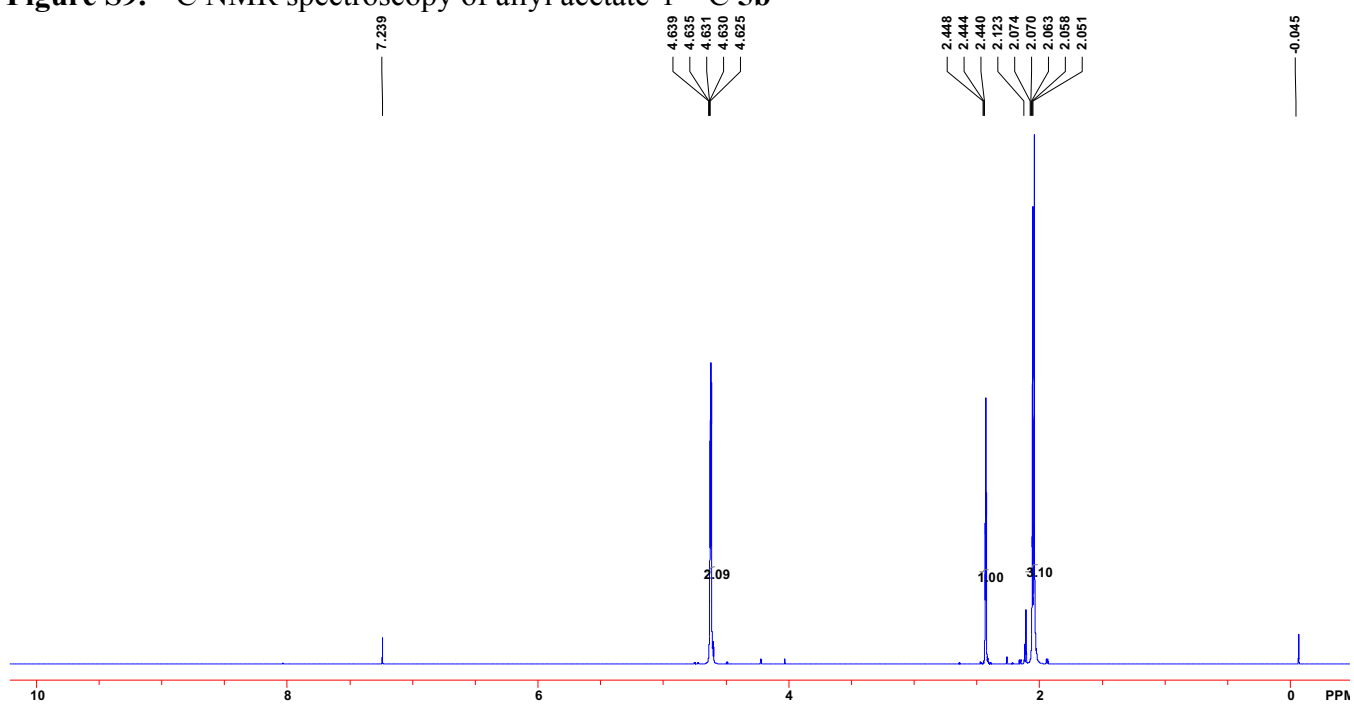

Figure S10.  $^1\text{H}$  NMR spectroscopy of propargyl acetate-1- $^{13}\text{C}$  **6b**

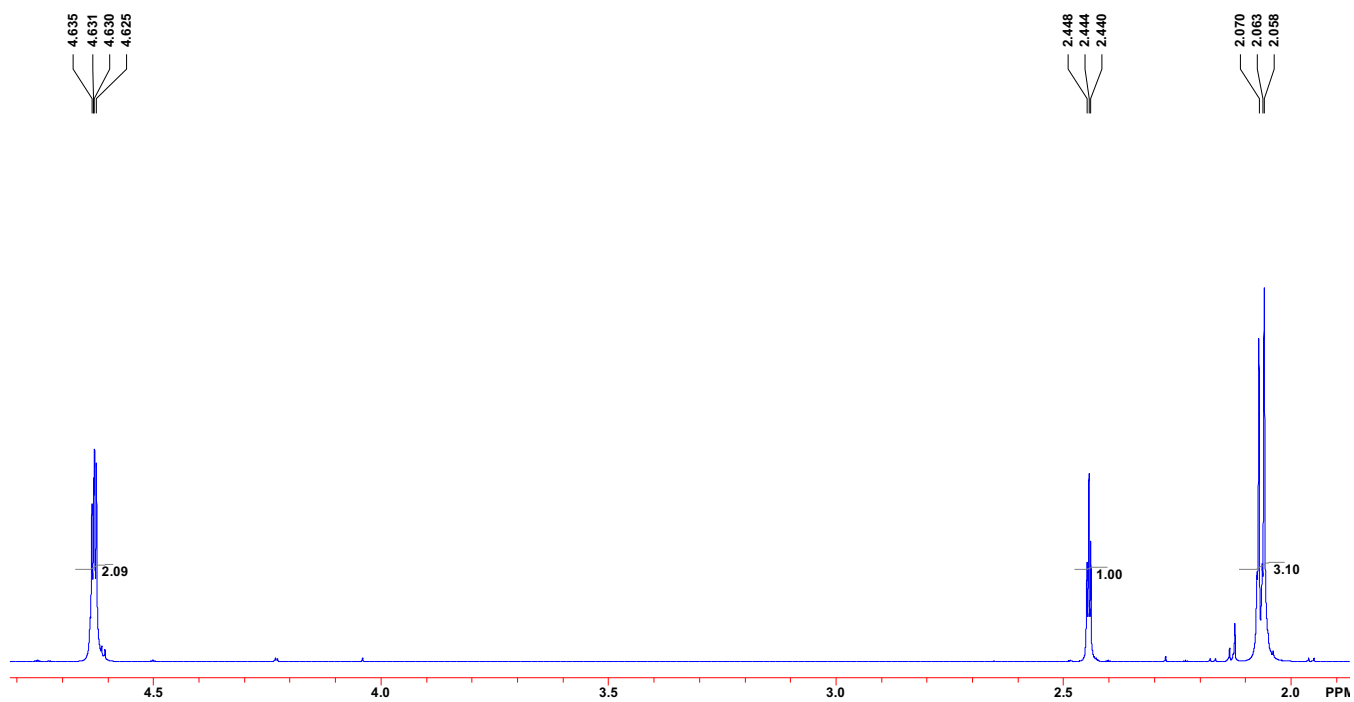

Figure S11.  $^1\text{H}$  NMR spectroscopy of propargyl acetate-1- $^{13}\text{C}$  **6b**

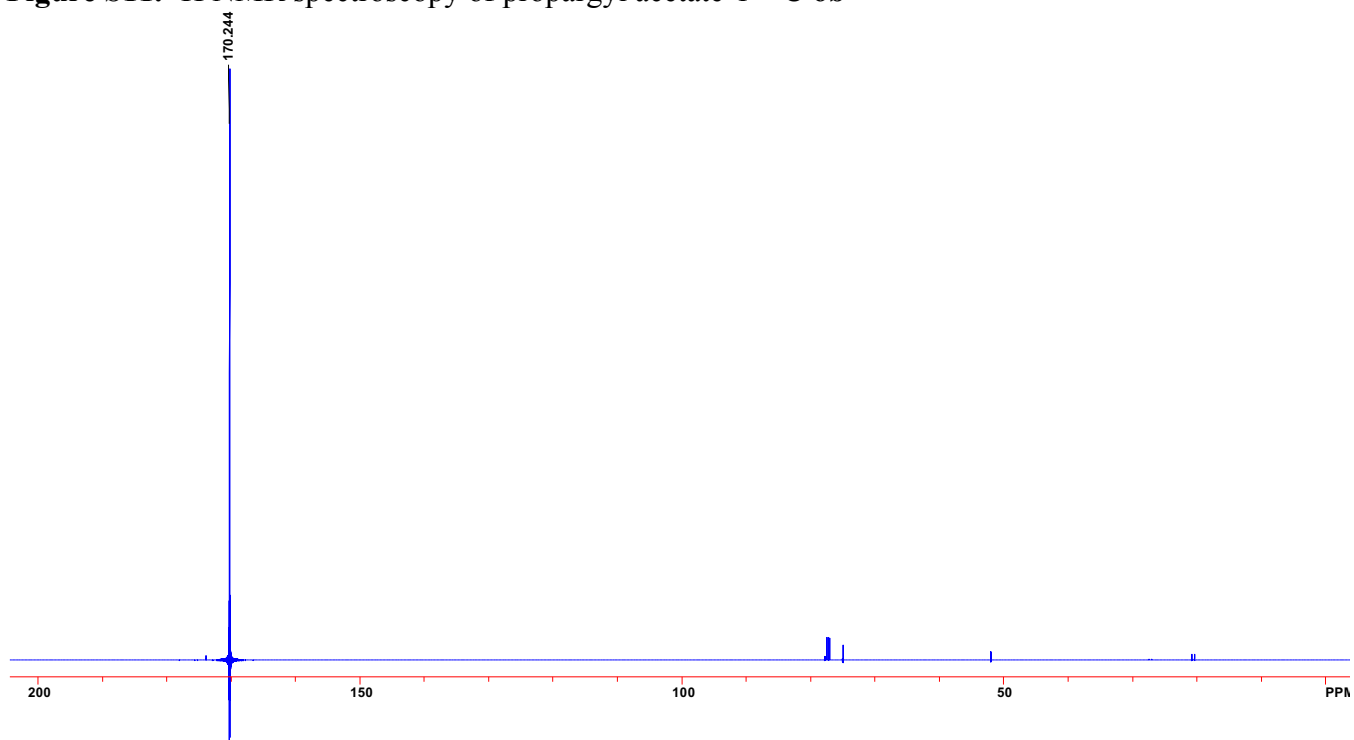

Figure S12.  $^{13}\text{C}$  NMR spectroscopy of propargyl acetate-1- $^{13}\text{C}$  **6b**



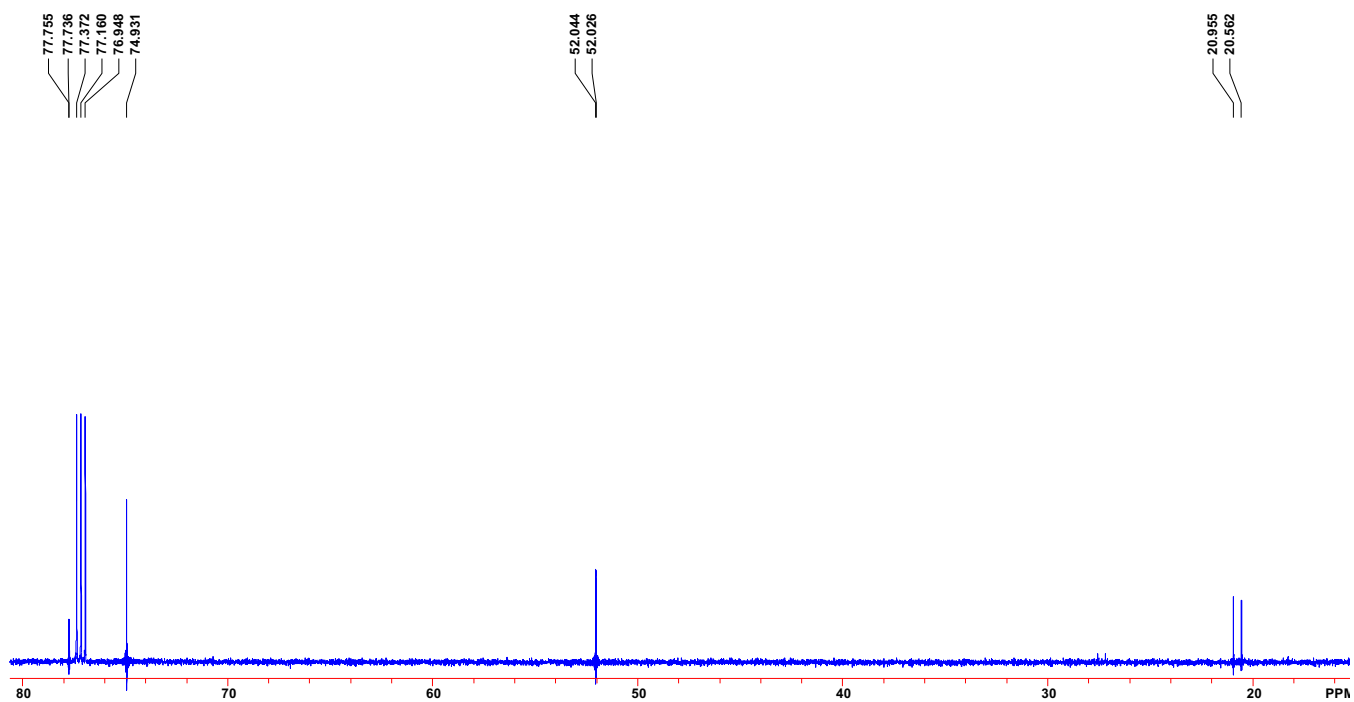

**Figure S13.**  $^{13}\text{C}$  NMR spectroscopy of propargyl acetate- $1\text{-}^{13}\text{C}$  **6b**

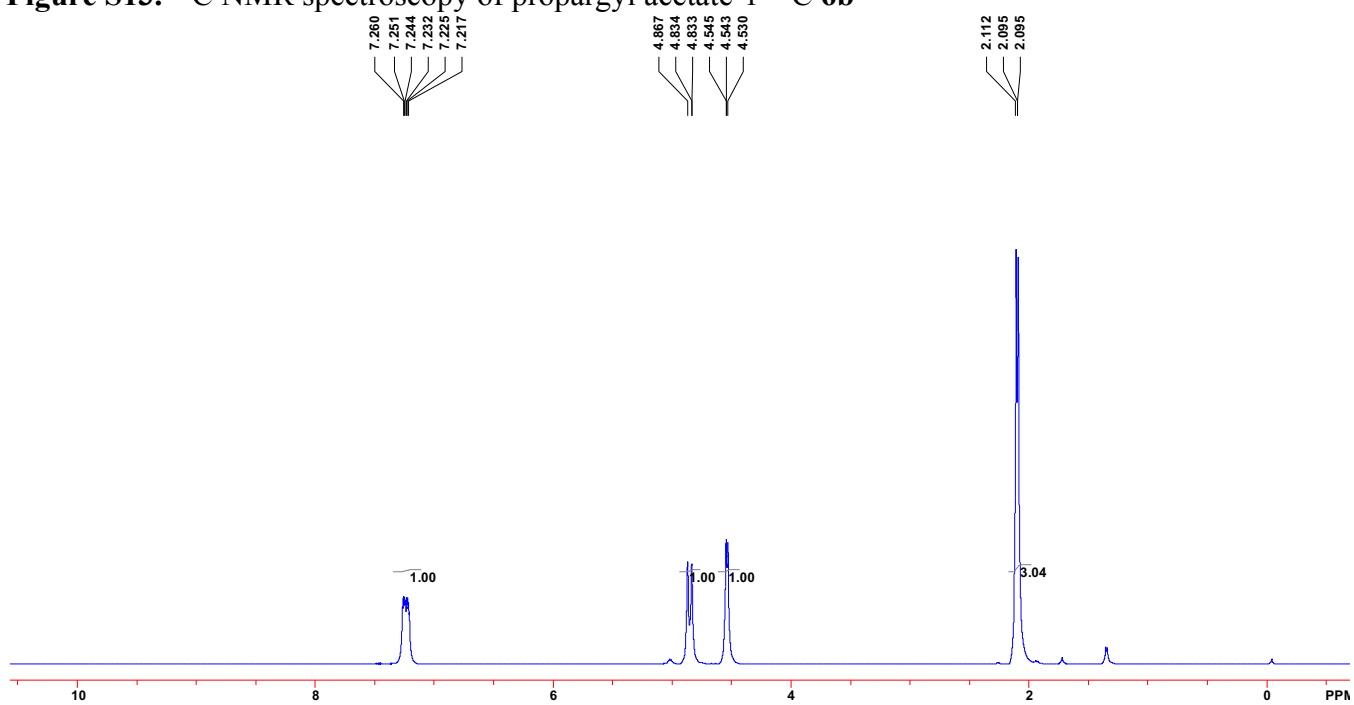

**Figure S14.**  $^1\text{H}$  NMR spectroscopy of vinyl acetate- $1\text{-}^{13}\text{C}$  **7b**

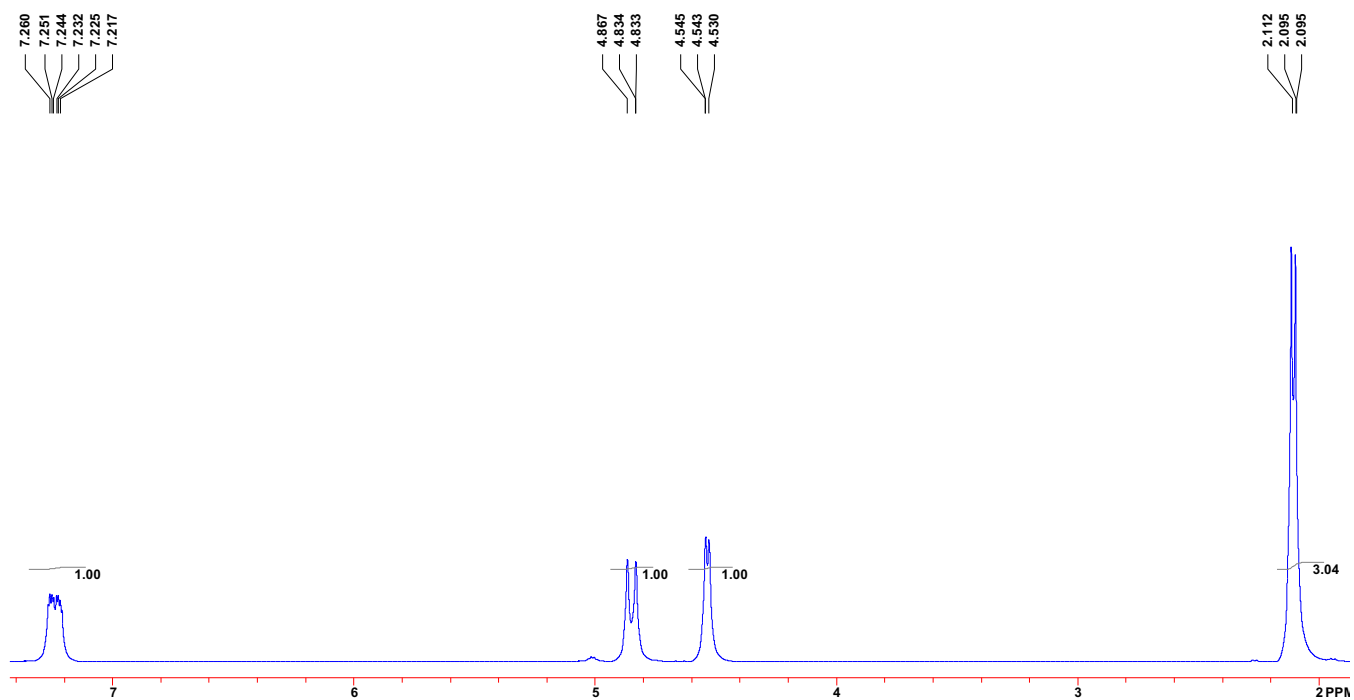

**Figure S15.**  $^1\text{H}$  NMR spectroscopy of vinyl acetate-1- $^{13}\text{C}$  **7b**

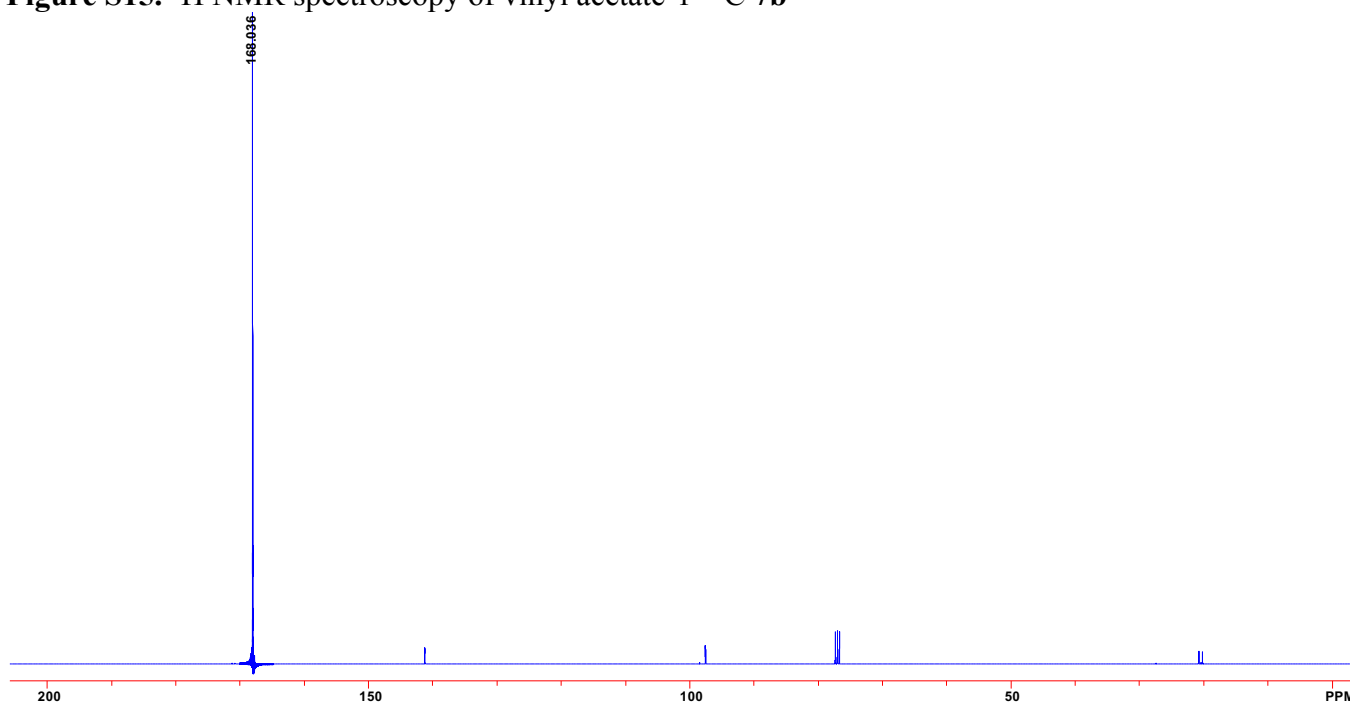

**Figure S16.**  $^{13}\text{C}$  NMR spectroscopy of vinyl acetate-1- $^{13}\text{C}$  **7b**

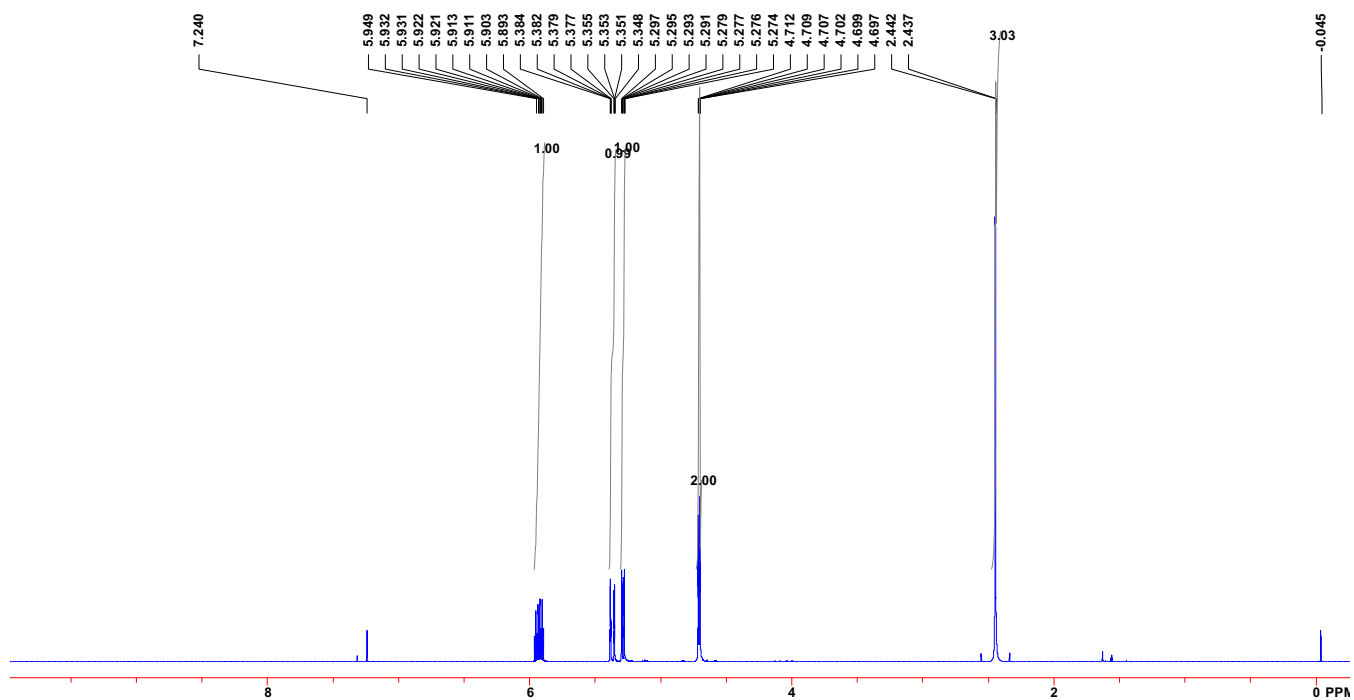

Figure S17.  $^1\text{H}$  NMR spectroscopy of allyl pyruvate **8a**

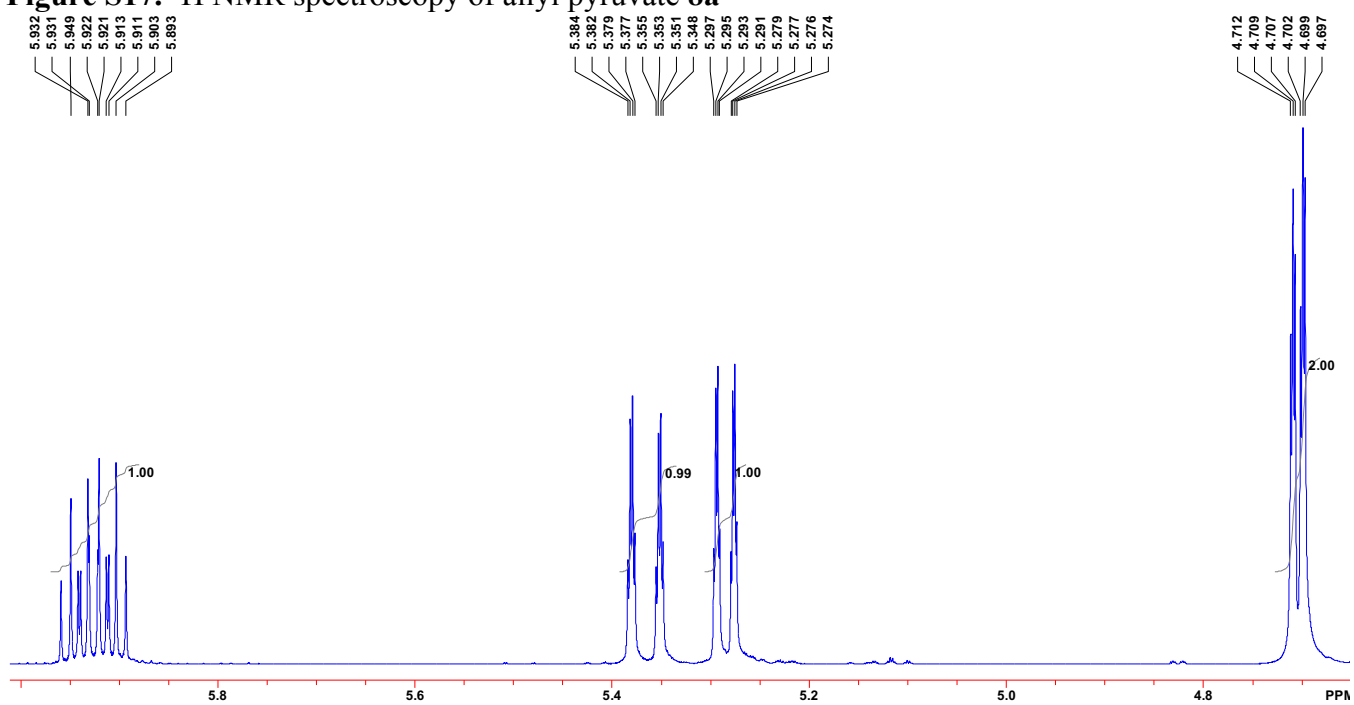

Figure S18.  $^1\text{H}$  NMR spectroscopy of allyl pyruvate **8a**

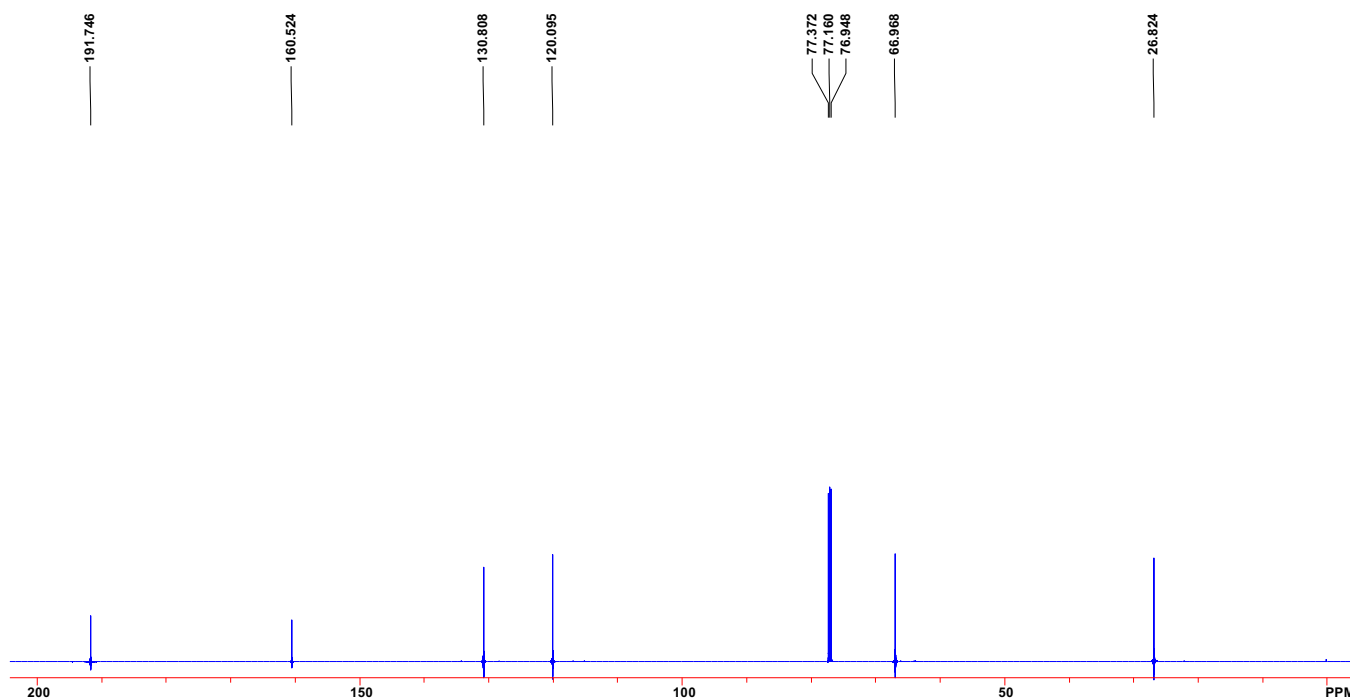

Figure S19.  $^{13}\text{C}$  NMR spectroscopy of allyl pyruvate **8a**

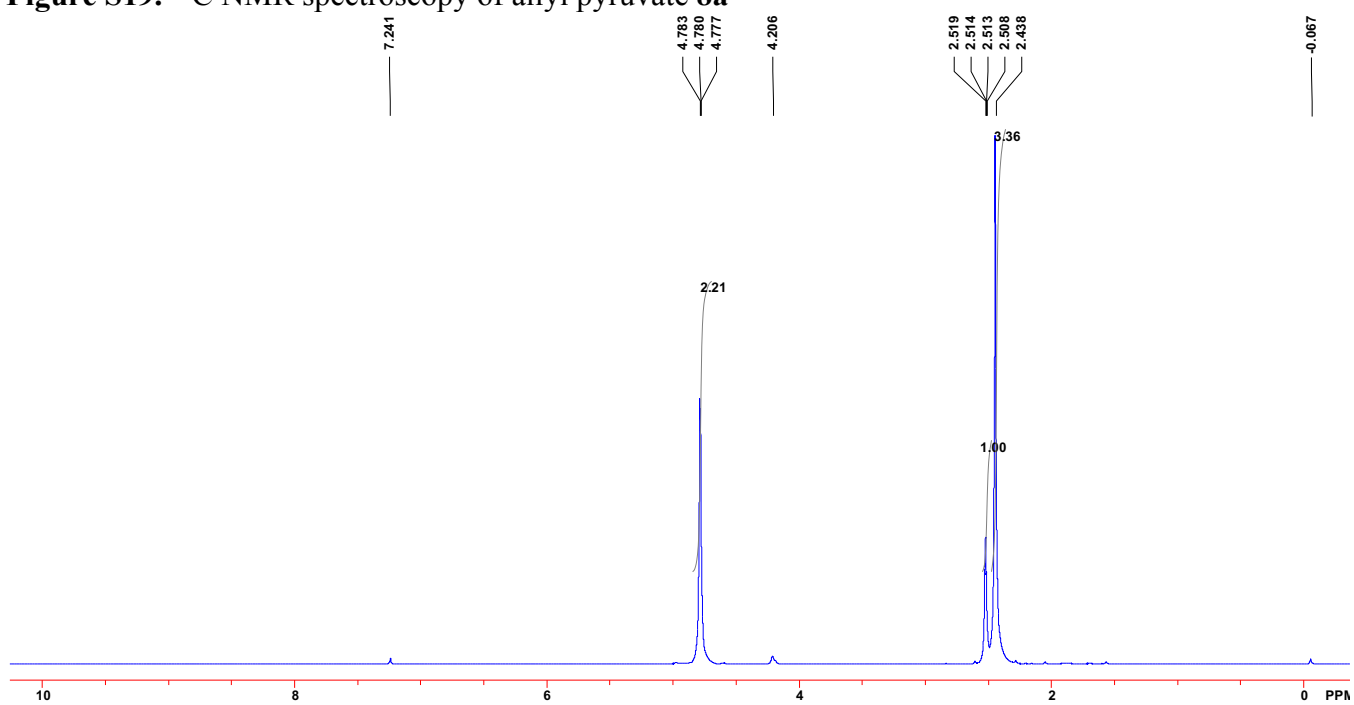

Figure S20.  $^1\text{H}$  NMR spectroscopy of propargyl pyruvate **9a**

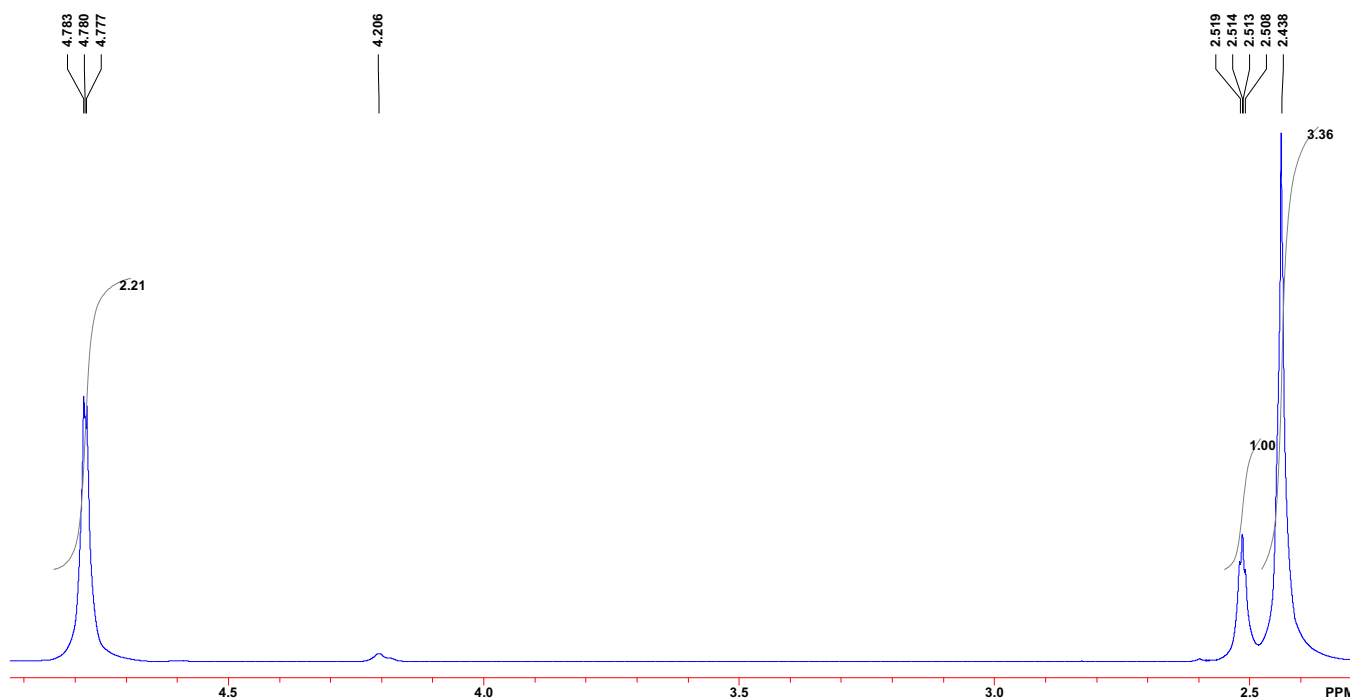

Figure S21.  $^1\text{H}$  NMR spectroscopy of propargyl pyruvate **9a**

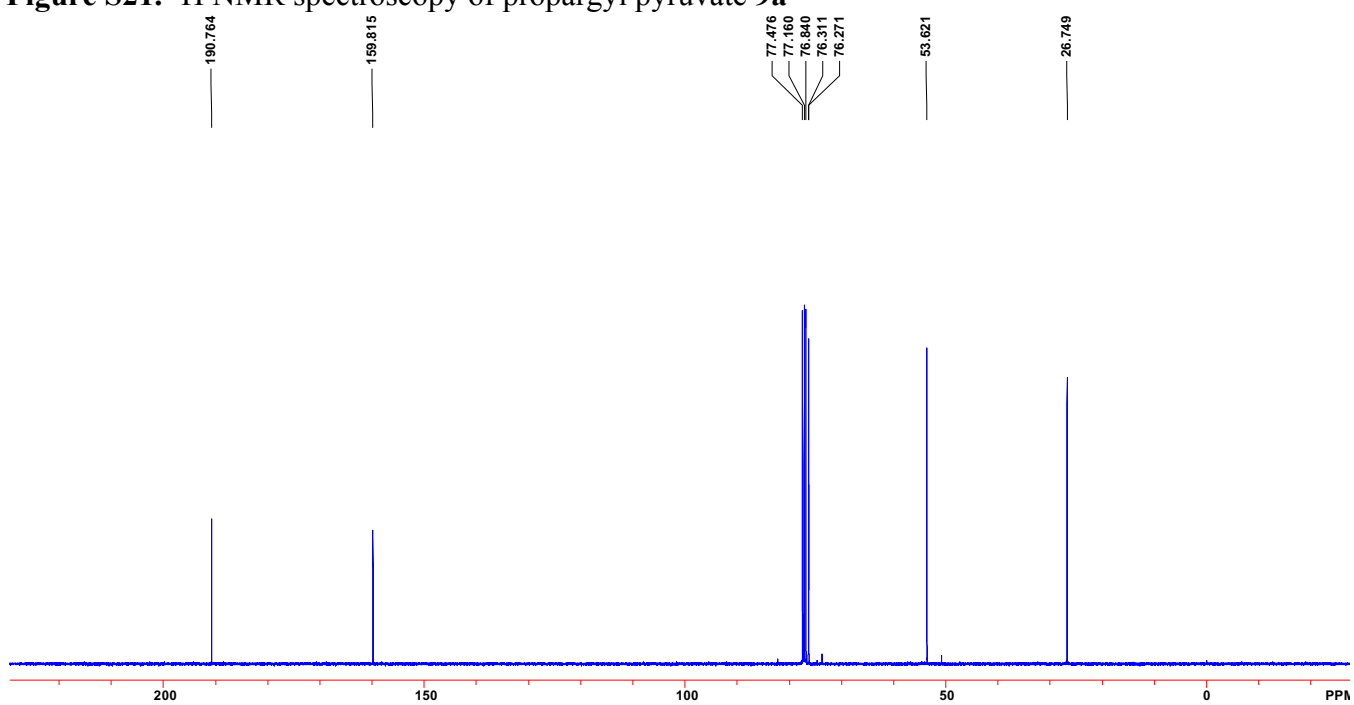

Figure S22.  $^{13}\text{C}$  NMR spectroscopy of propargyl pyruvate **9a**

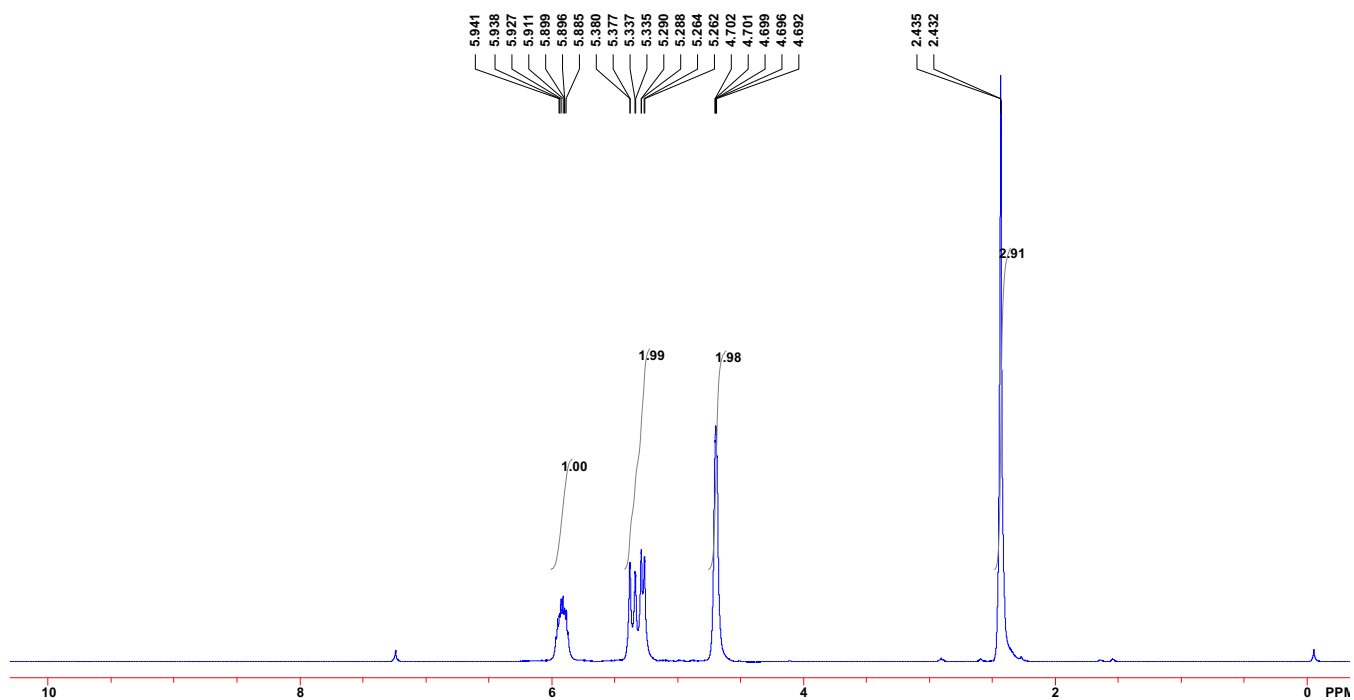

Figure S23.  $^1\text{H}$  NMR spectroscopy of allyl pyruvate-1- $^{13}\text{C}$  **8b**

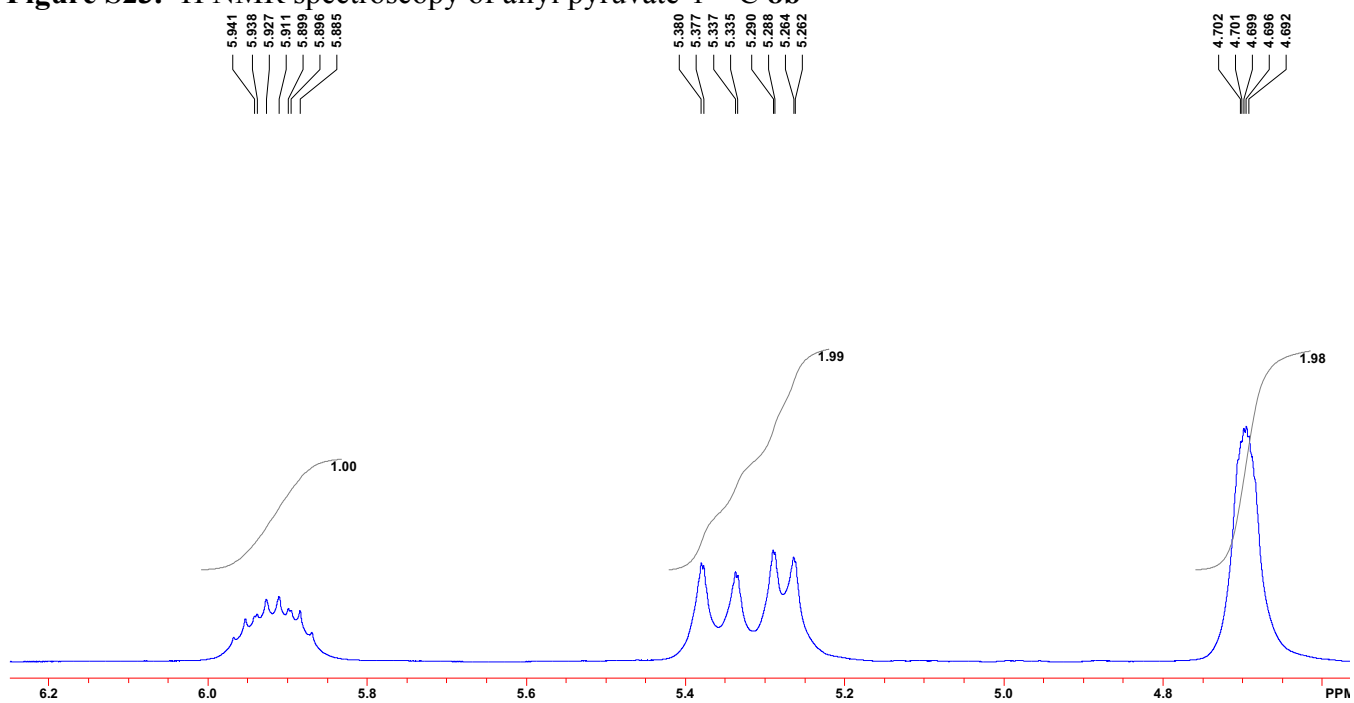

Figure S24.  $^1\text{H}$  NMR spectroscopy of allyl pyruvate-1- $^{13}\text{C}$  **8b**

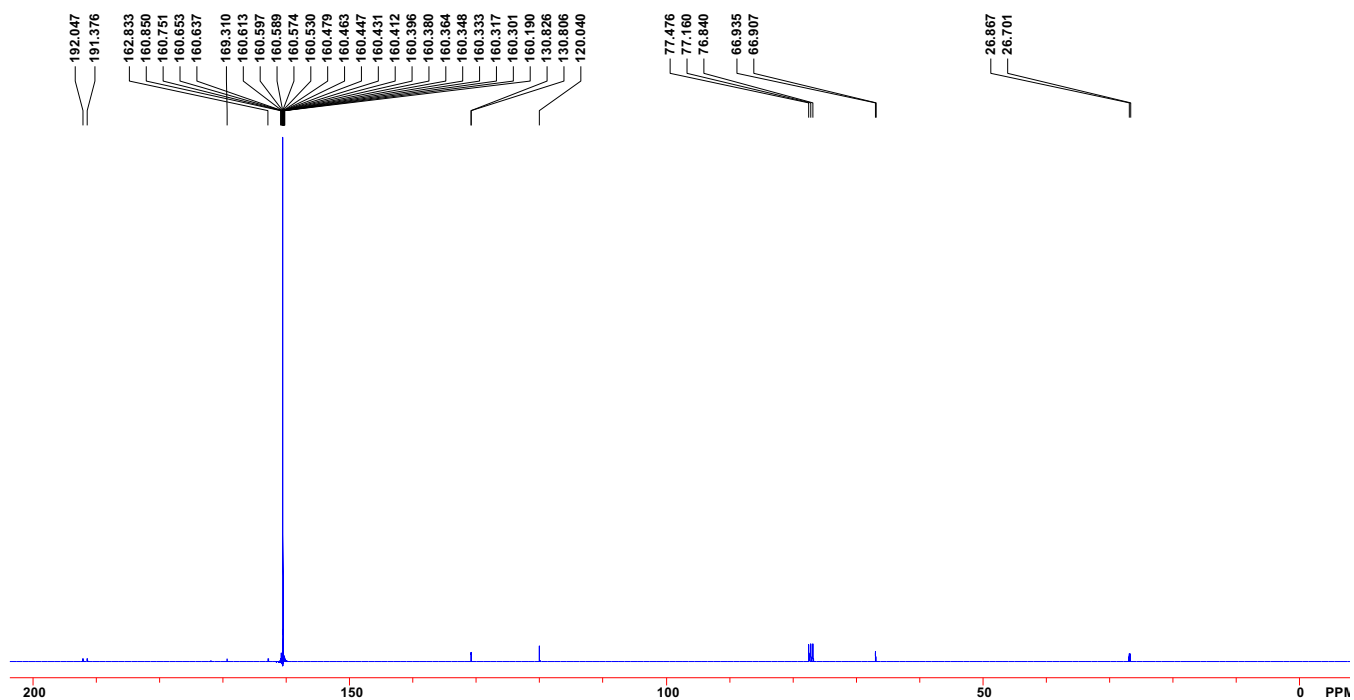

Figure S25.  $^{13}\text{C}$  NMR spectroscopy of allyl pyruvate-1- $^{13}\text{C}$  **8b**

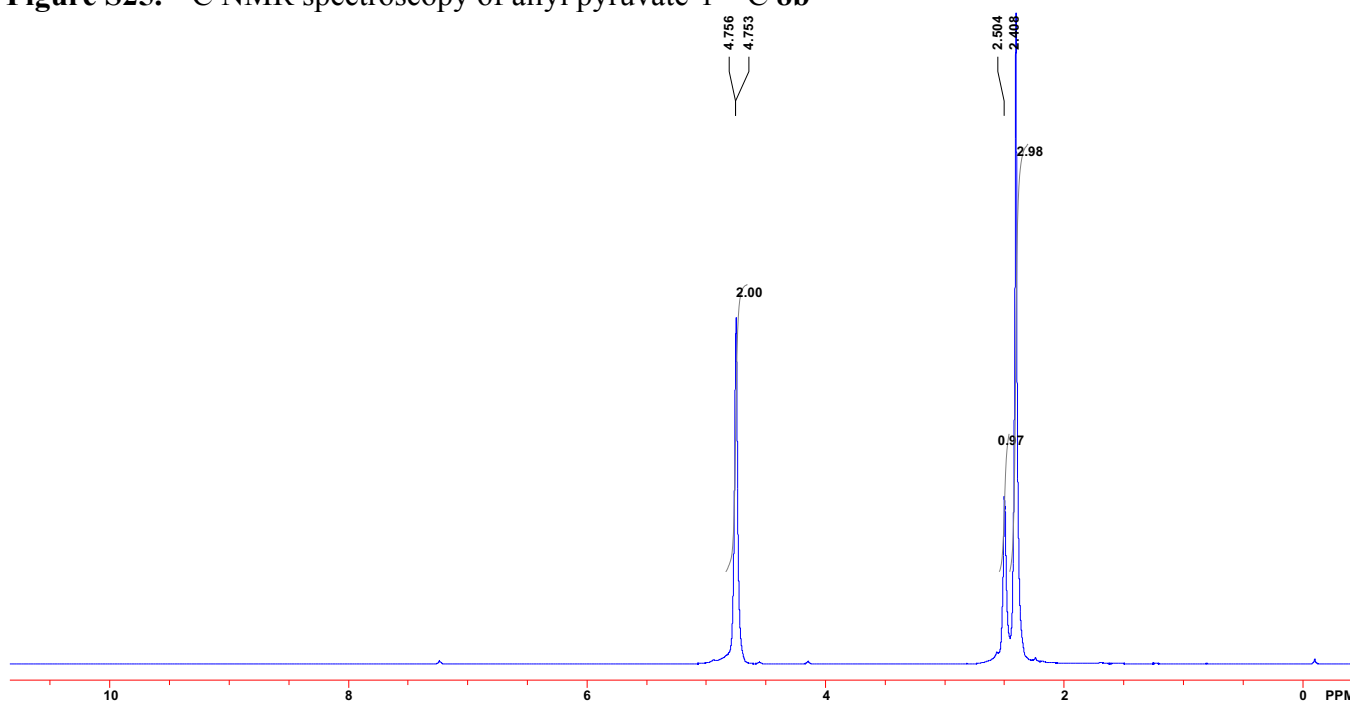

Figure S26.  $^1\text{H}$  NMR spectroscopy of propargyl pyruvate-1- $^{13}\text{C}$

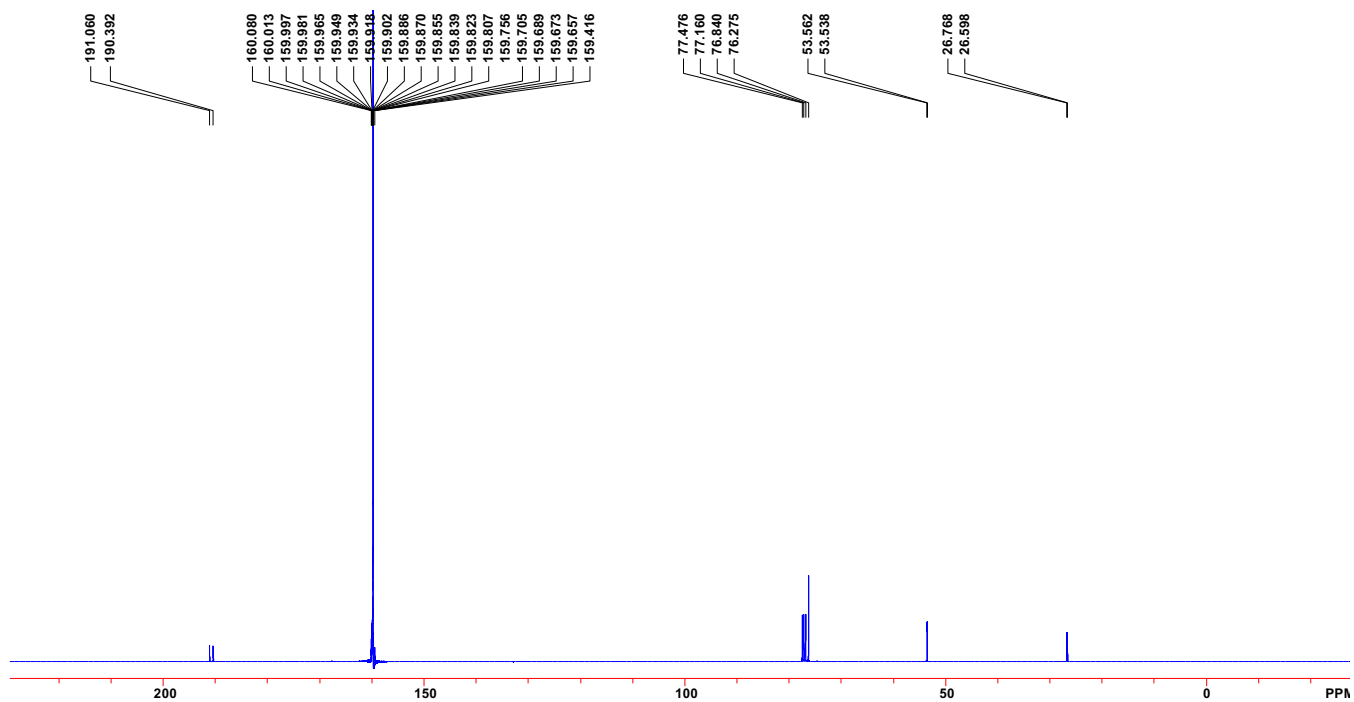

Figure S27.  $^{13}\text{C}$  NMR spectroscopy of propargyl pyruvate-1- $^{13}\text{C}$  **9b**

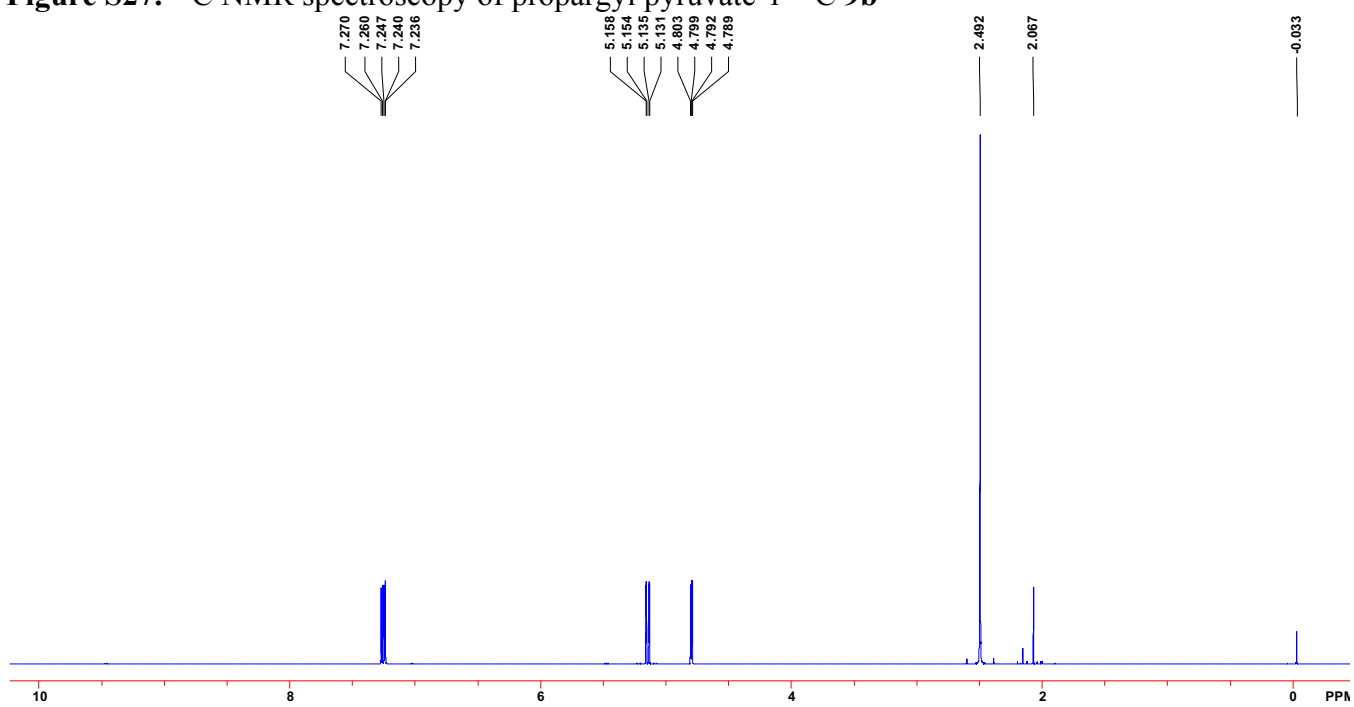

Figure S28.  $^1\text{H}$  NMR spectroscopy of vinyl pyruvate **10a**



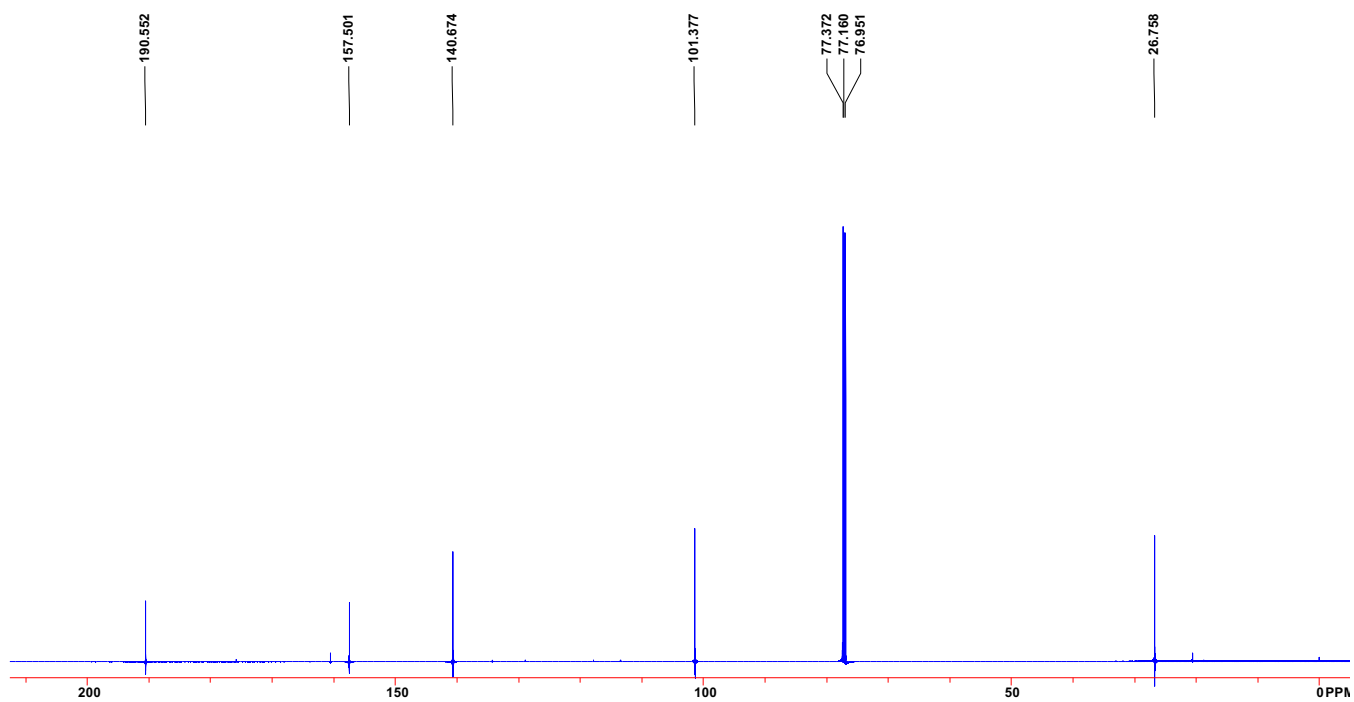

**Figure S29.** <sup>13</sup>C NMR spectroscopy of vinyl pyruvate **10a**

## 2. Additional Figures (S30-S39): $^1\text{H}$ NMR and $^{13}\text{C}$ NMR spectra of pyruvates in $\text{CD}_3\text{OD}$ .

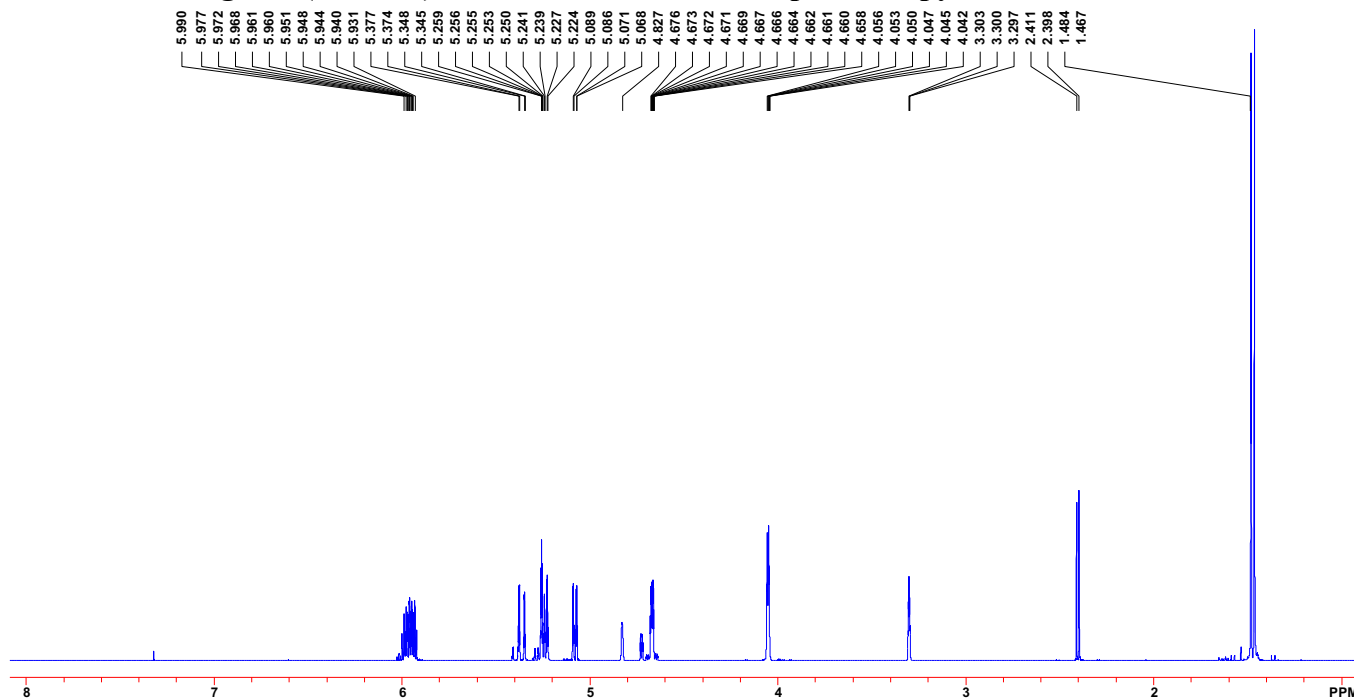

Figure S30.  $^1\text{H}$  NMR spectroscopy of allyl pyruvate **8a**

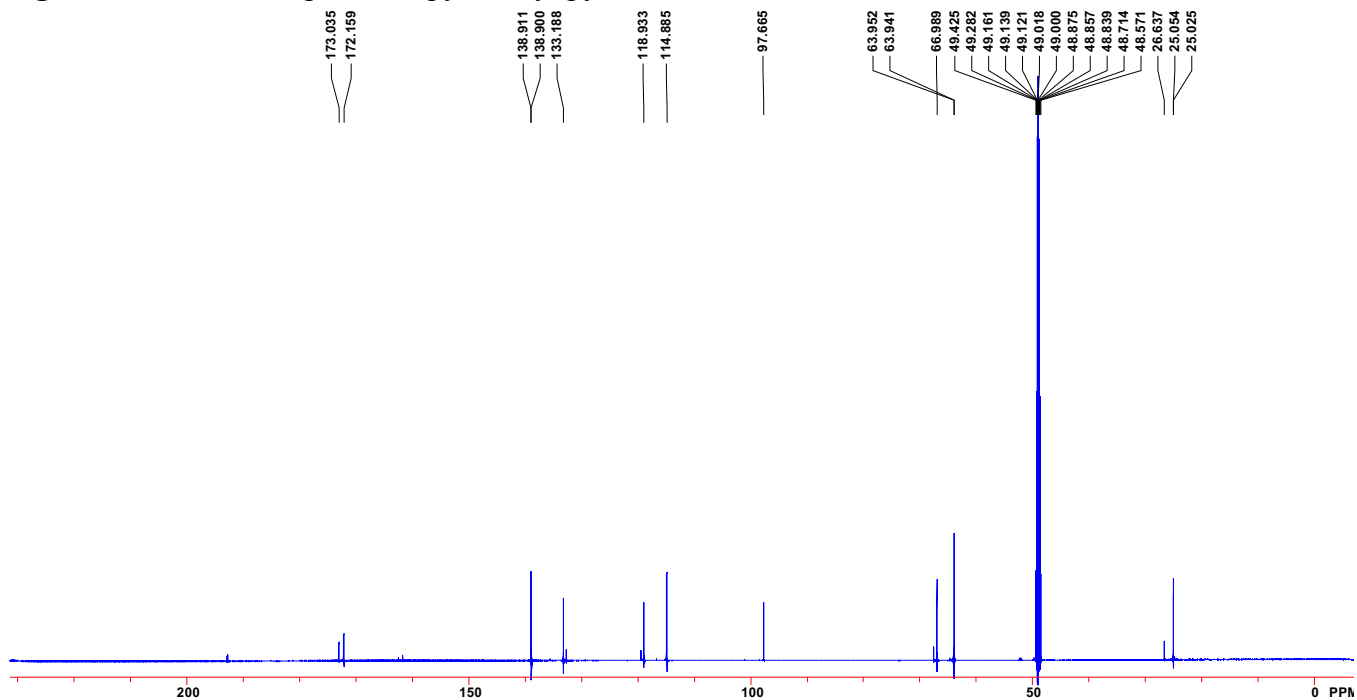

Figure S31.  $^{13}\text{C}$  NMR spectroscopy of allyl pyruvate **8a**

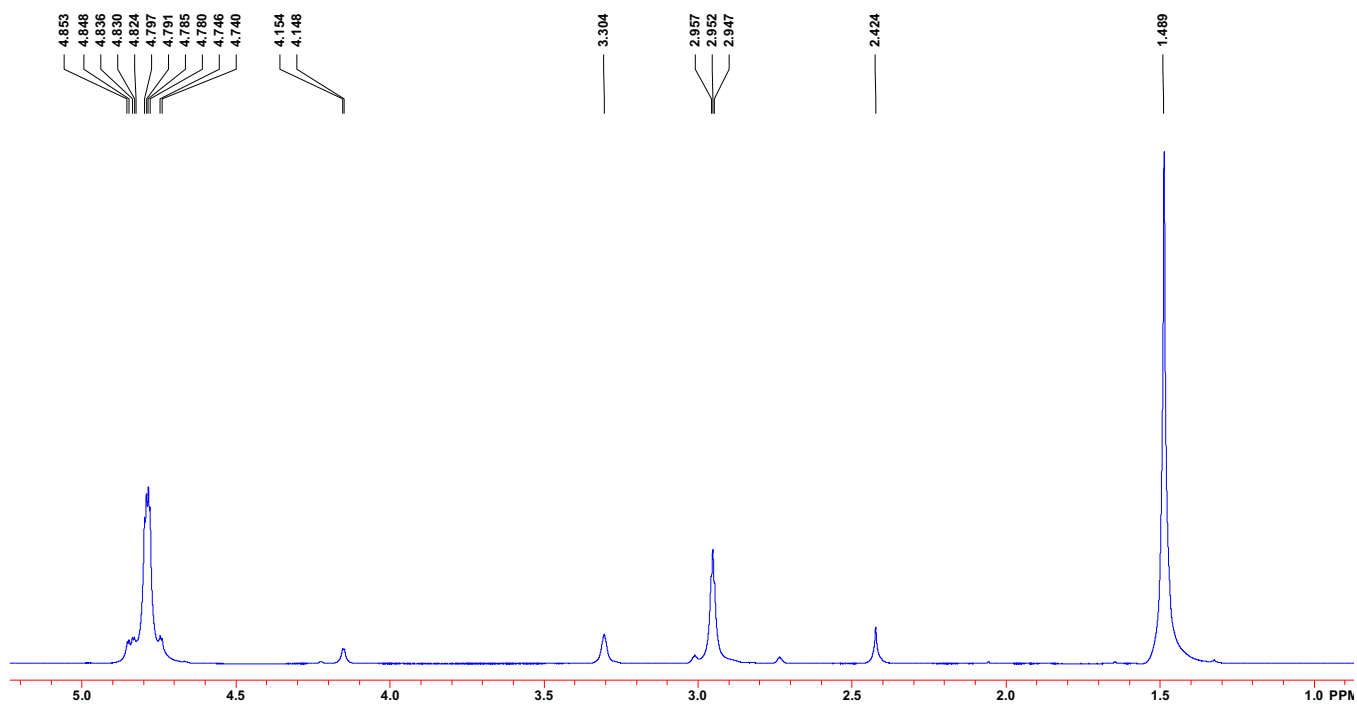

Figure S32.  $^1\text{H}$  NMR spectroscopy of propargyl pyruvate **9a**

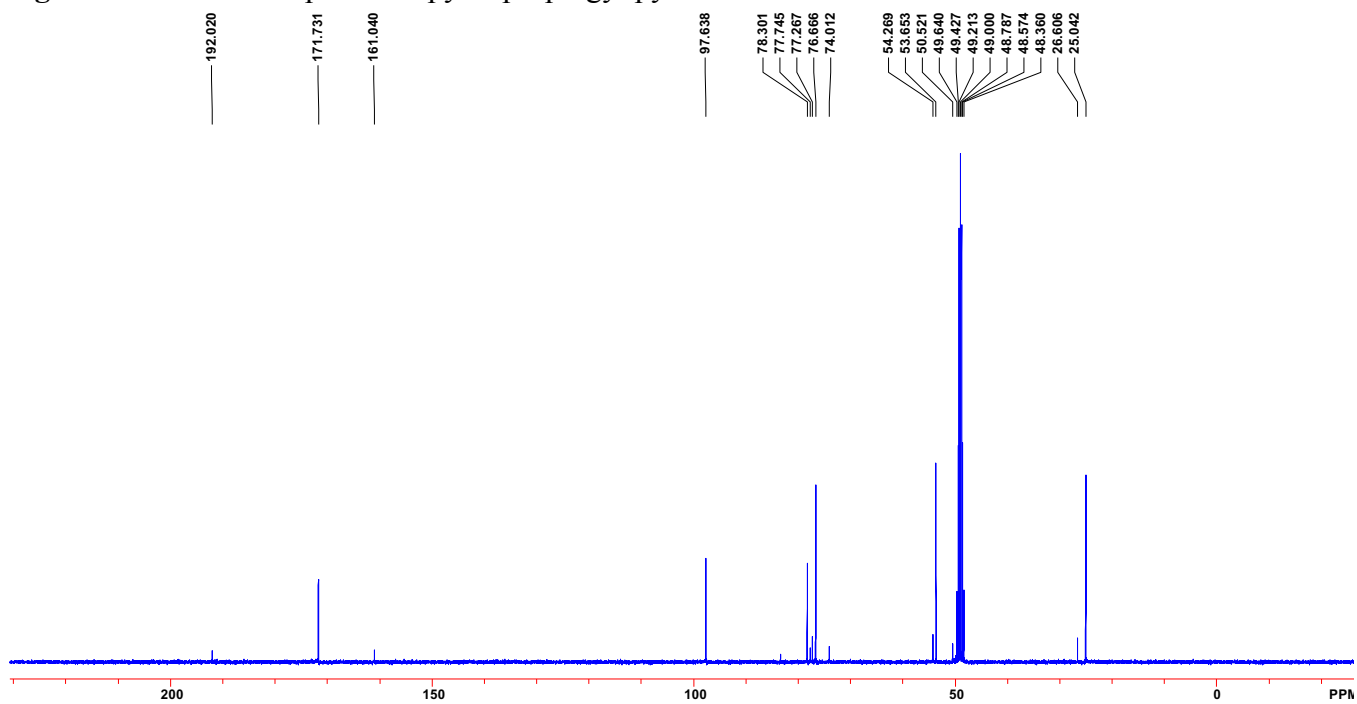

Figure S33.  $^{13}\text{C}$  NMR spectroscopy of propargyl pyruvate **9a**

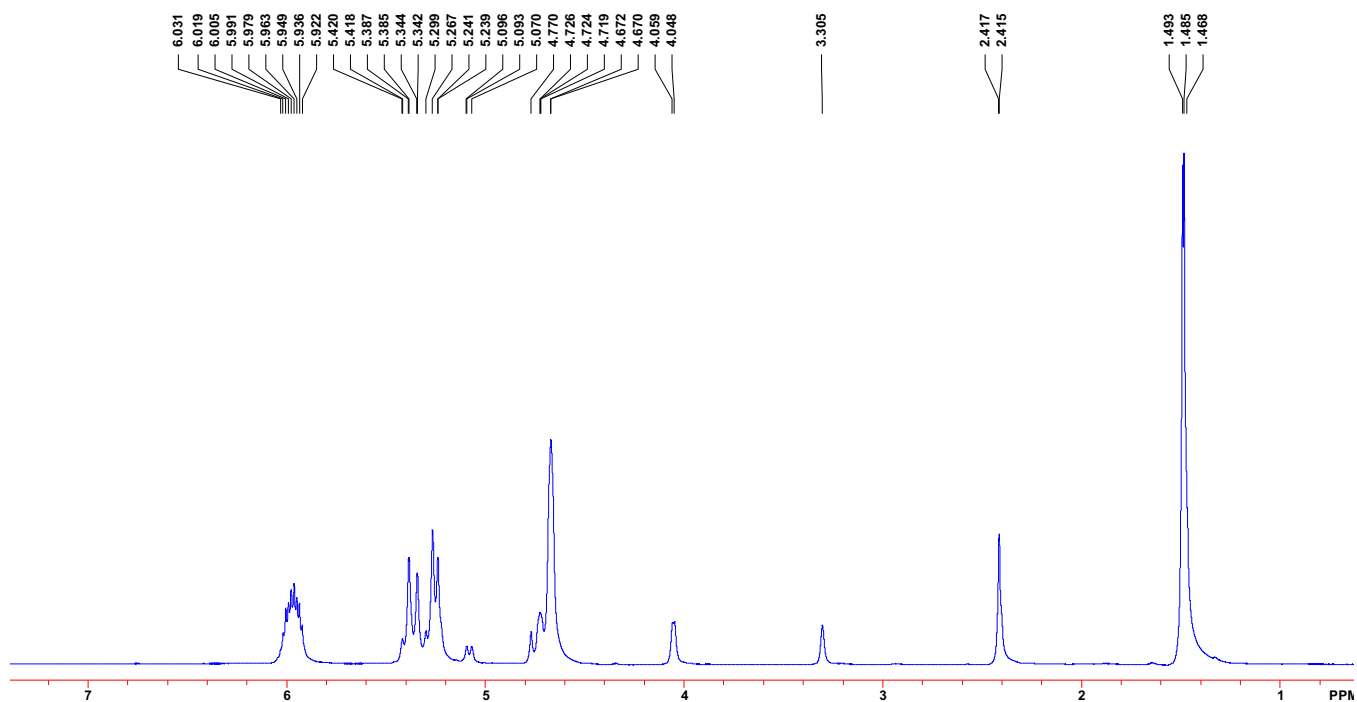

**Figure S34.**  $^1\text{H}$  NMR spectroscopy of allyl pyruvate-1- $^{13}\text{C}$  **8b**

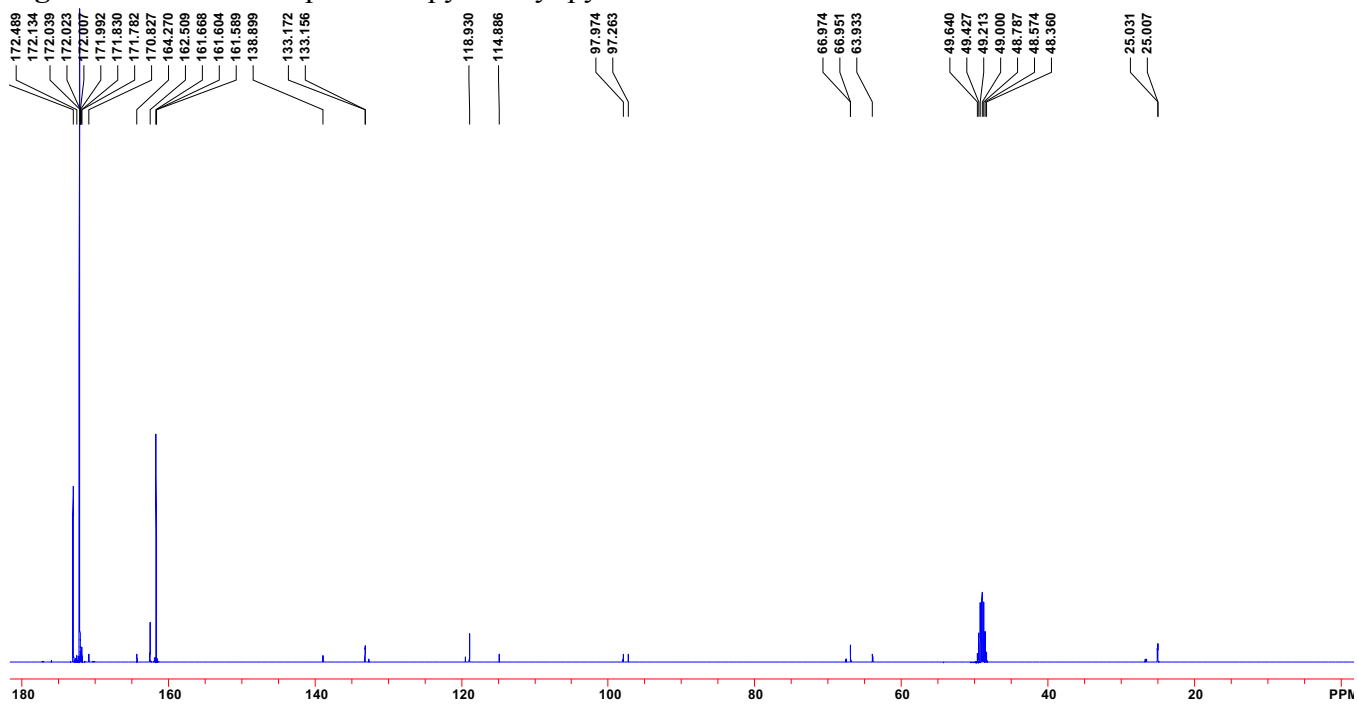

**Figure S35.**  $^{13}\text{C}$  NMR spectroscopy of allyl pyruvate-1- $^{13}\text{C}$  **8b**

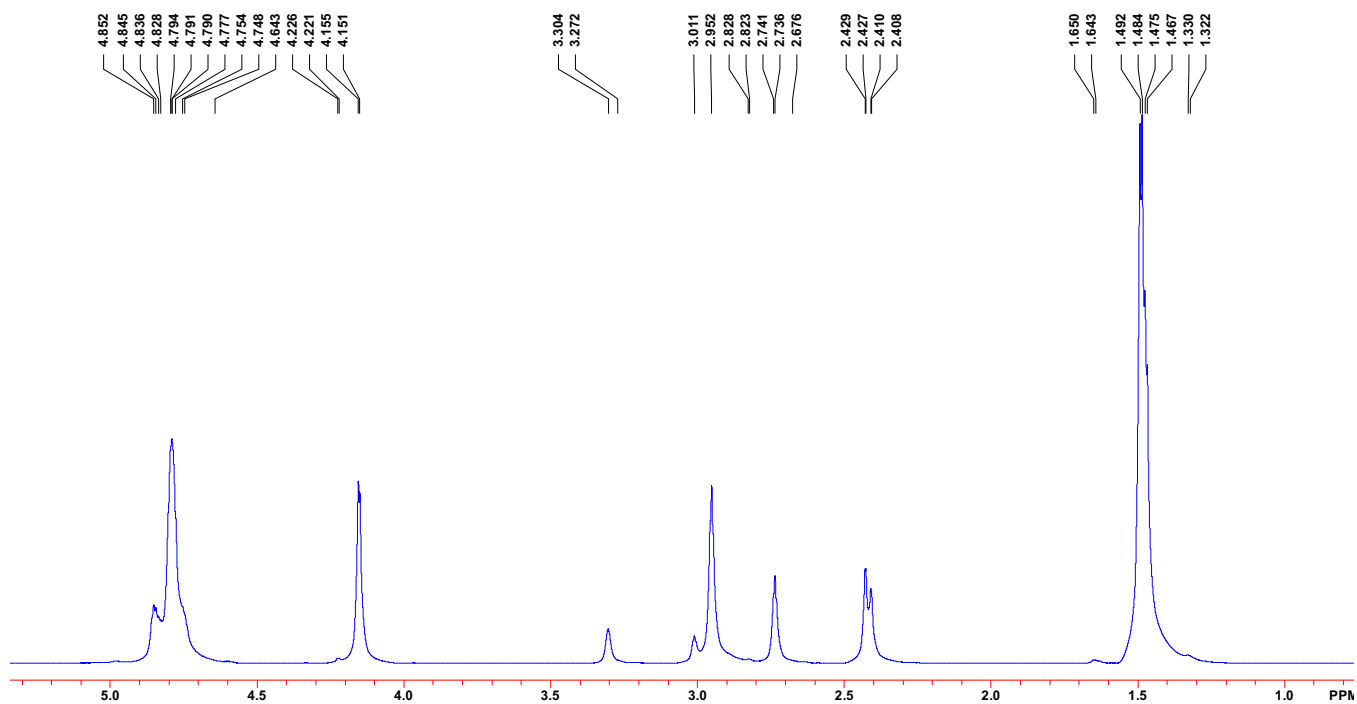

**Figure S36.**  $^1\text{H}$  NMR spectroscopy of propargyl pyruvate-1- $^{13}\text{C}$  **9b**

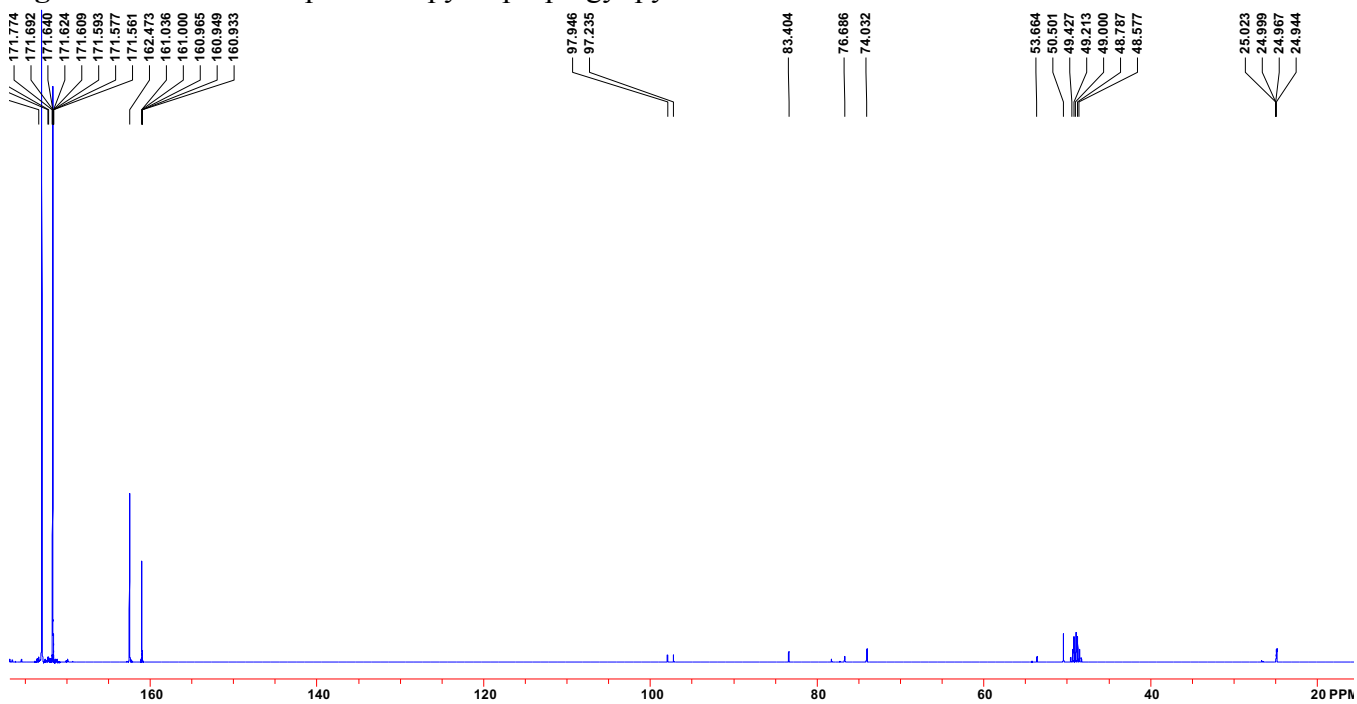

**Figure S37.**  $^{13}\text{C}$  NMR spectroscopy of propargyl pyruvate-1- $^{13}\text{C}$  **9b**

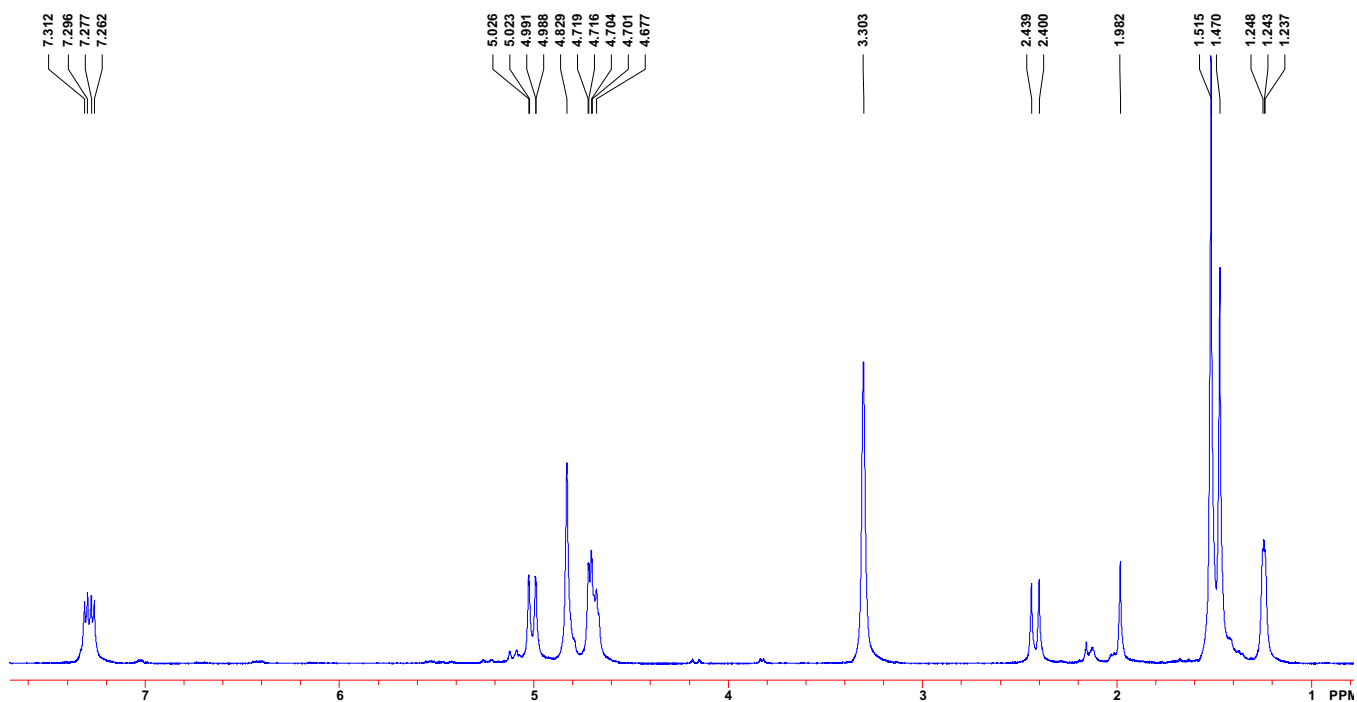

Figure S38.  $^1\text{H}$  NMR spectroscopy of vinyl pyruvate **10a**

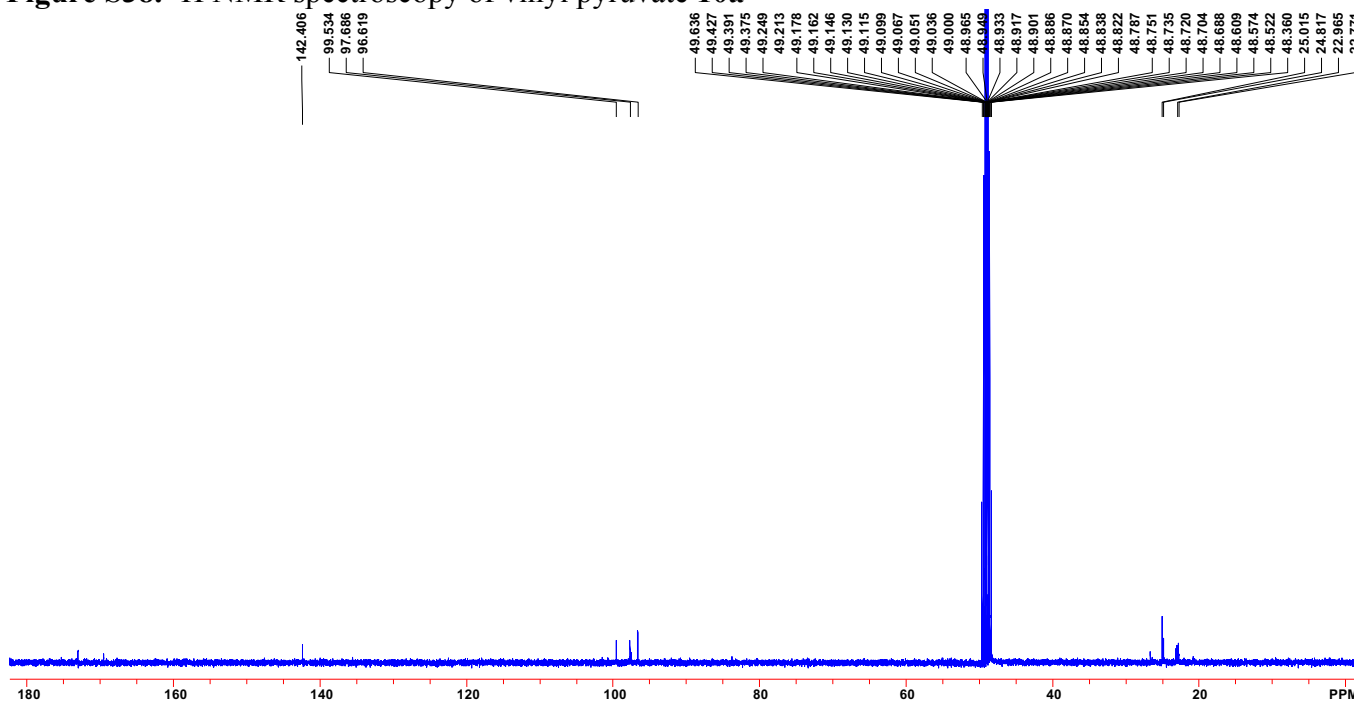

Figure S39.  $^{13}\text{C}$  NMR spectroscopy of vinyl pyruvate **10a**

3. Additional Figures (S40-S57):  $^1\text{H}$  NMR and  $^{13}\text{C}$  NMR spectra of neat acetates and pyruvates.

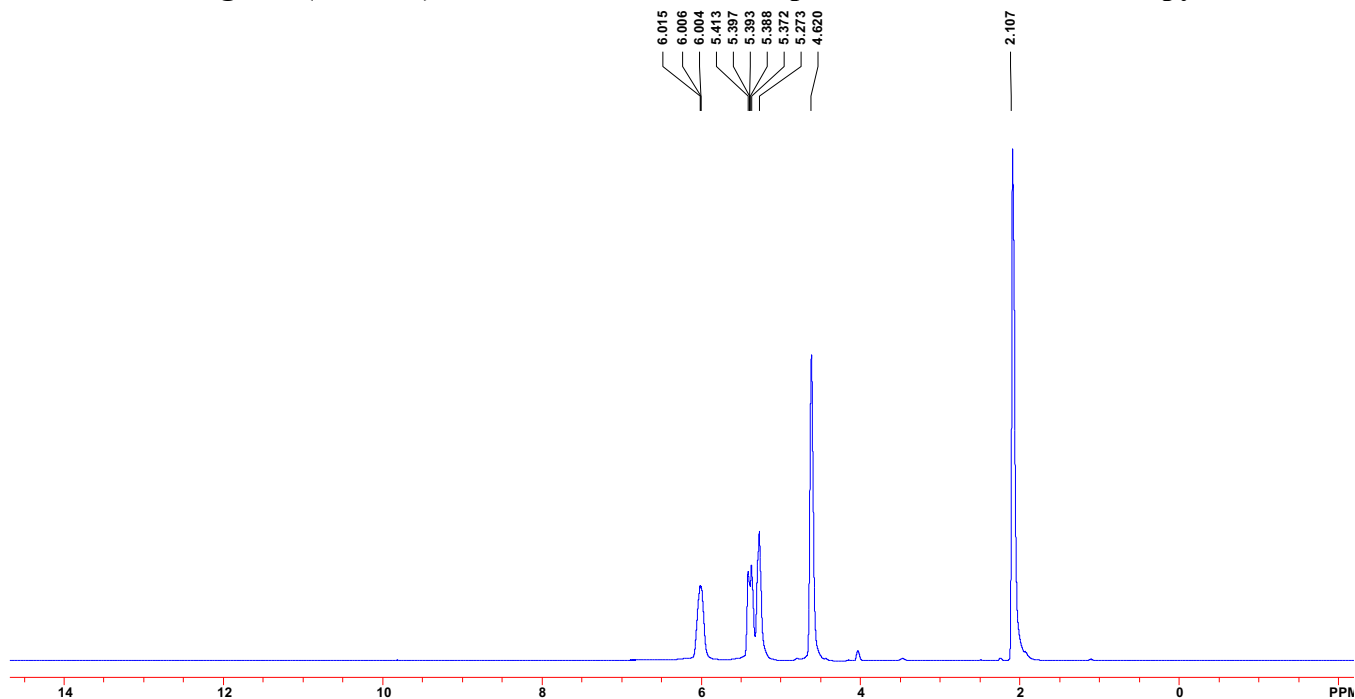

Figure S40.  $^1\text{H}$  NMR spectroscopy of allyl acetate **5a**

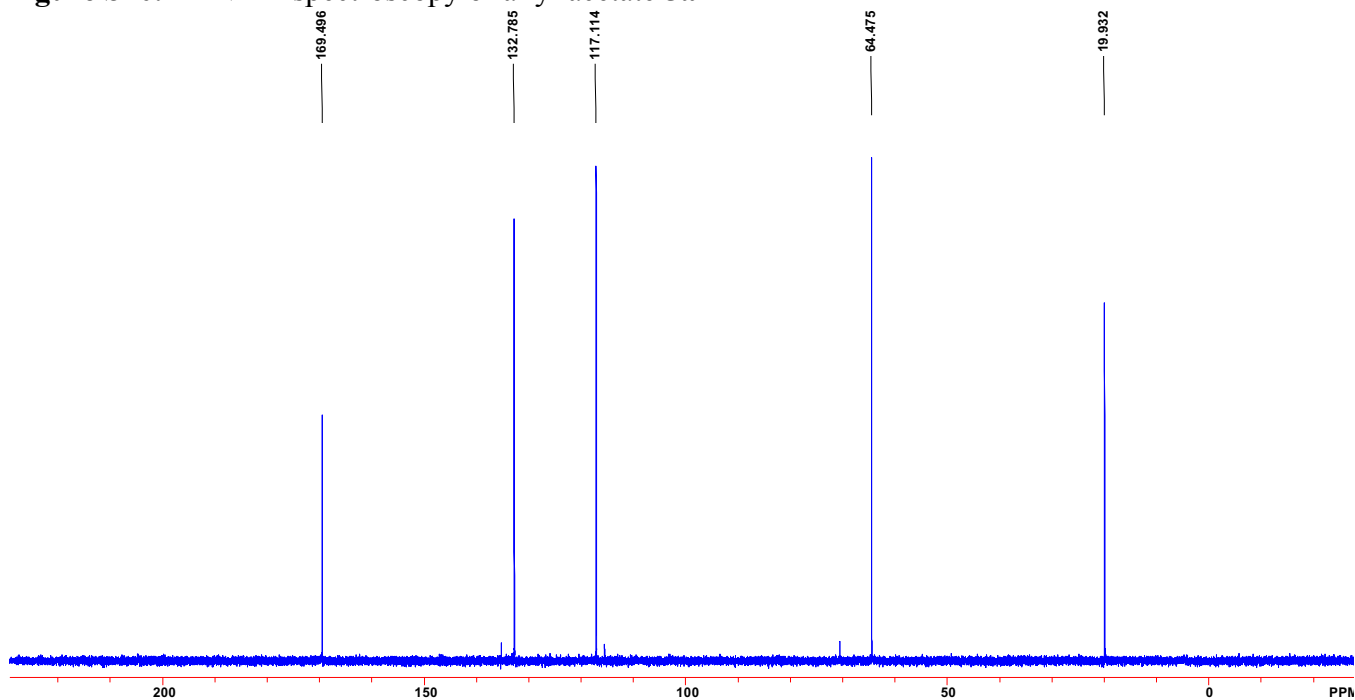

Figure S41.  $^{13}\text{C}$  NMR spectroscopy of allyl acetate **5a**

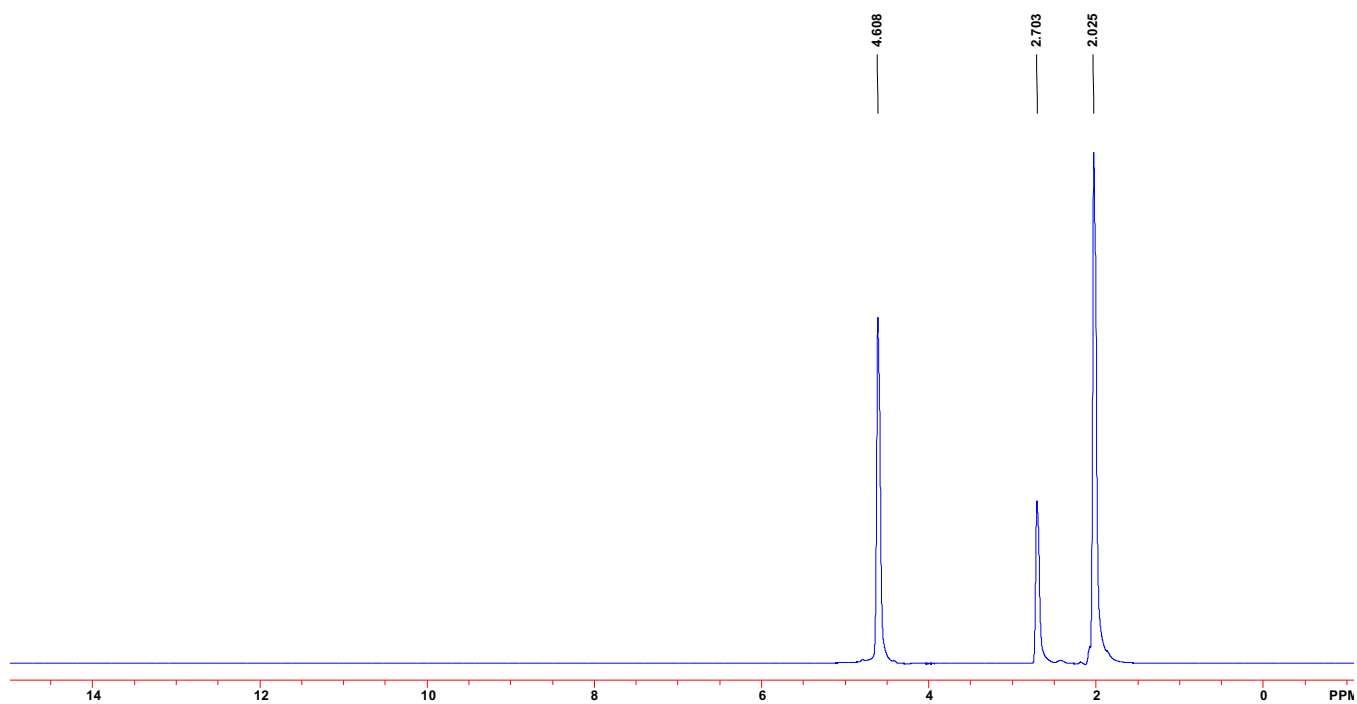

Figure S42. <sup>1</sup>H NMR spectroscopy of propargyl acetate **6a**

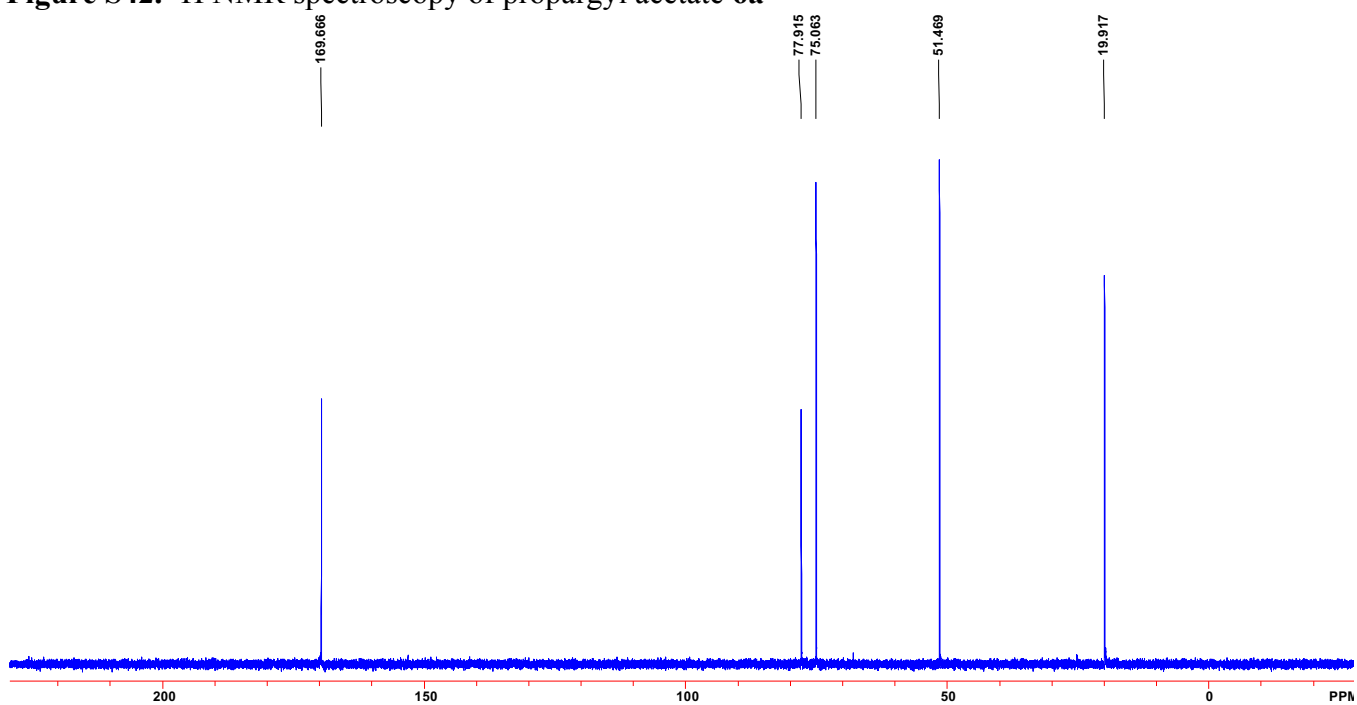

Figure S43. <sup>13</sup>C NMR spectroscopy of propargyl acetate **6a**



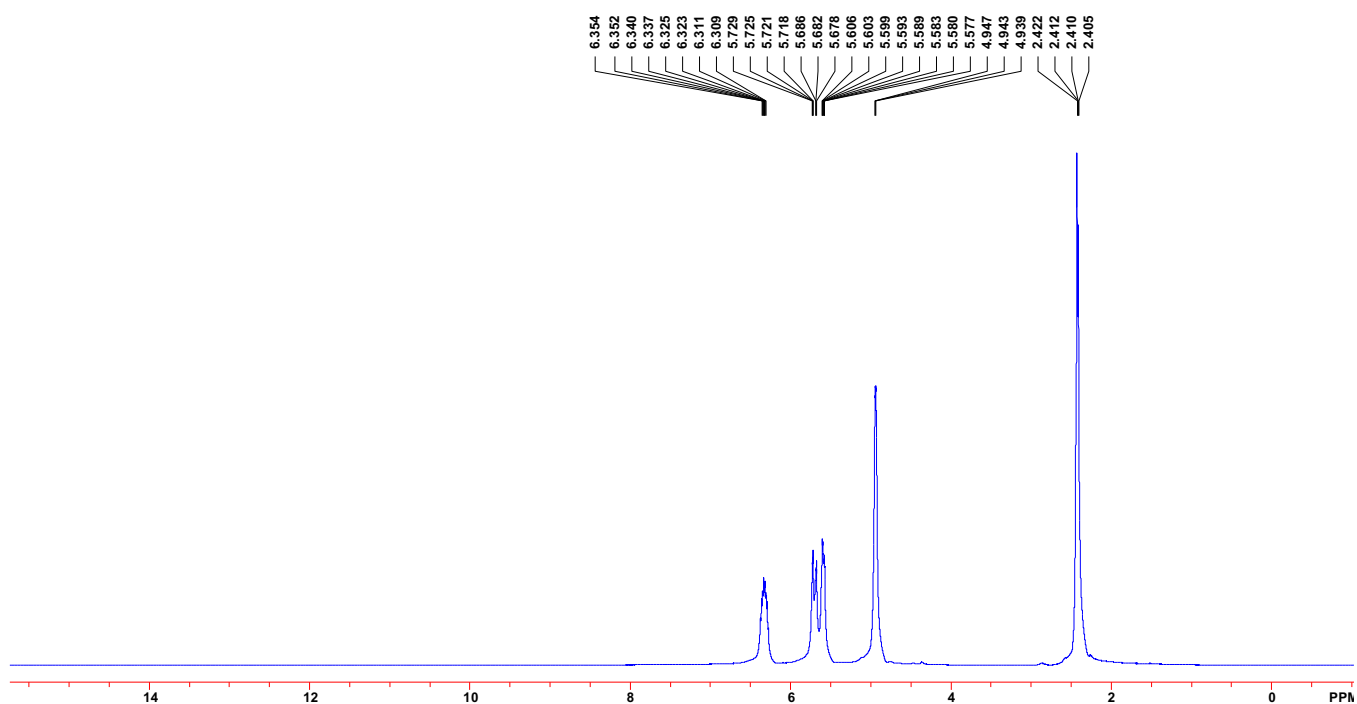

Figure S44.  $^1\text{H}$  NMR spectroscopy of allyl acetate- $1\text{-}^{13}\text{C}$  **5b**

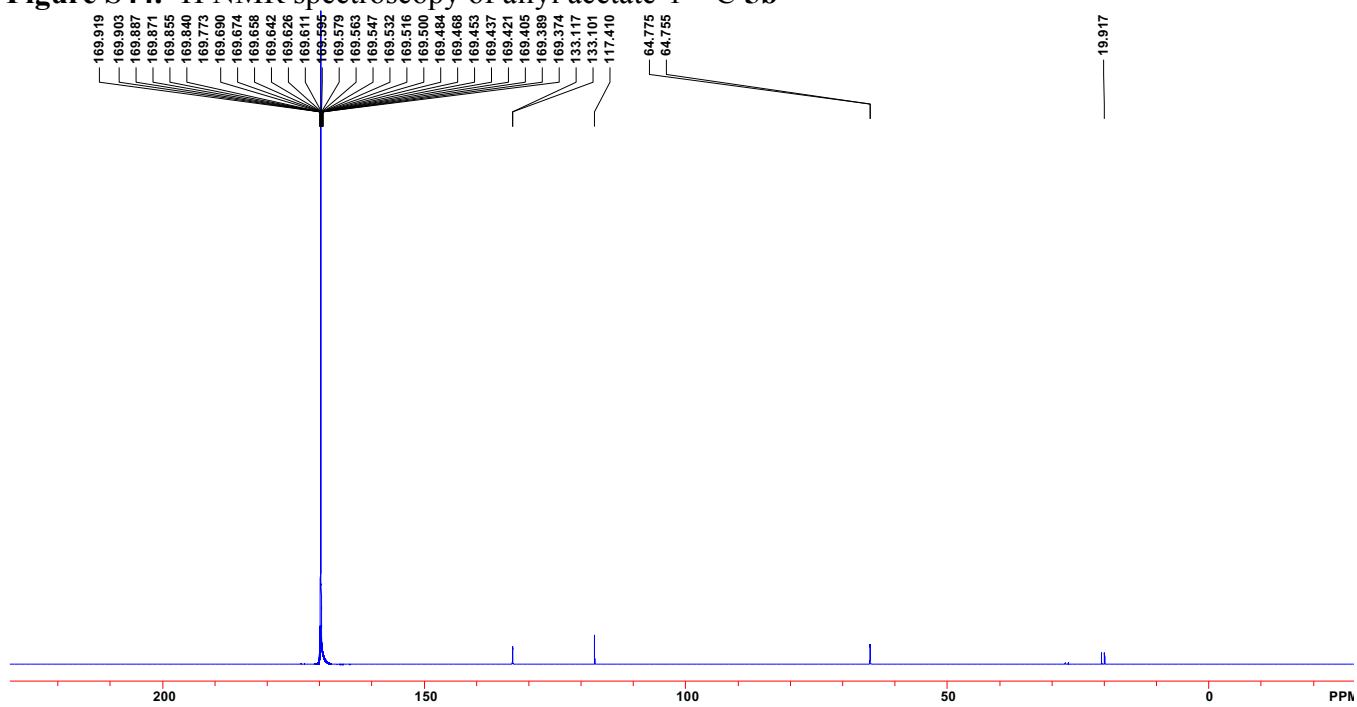

Figure S45.  $^{13}\text{C}$  NMR spectroscopy of allyl acetate- $1\text{-}^{13}\text{C}$  **5b**

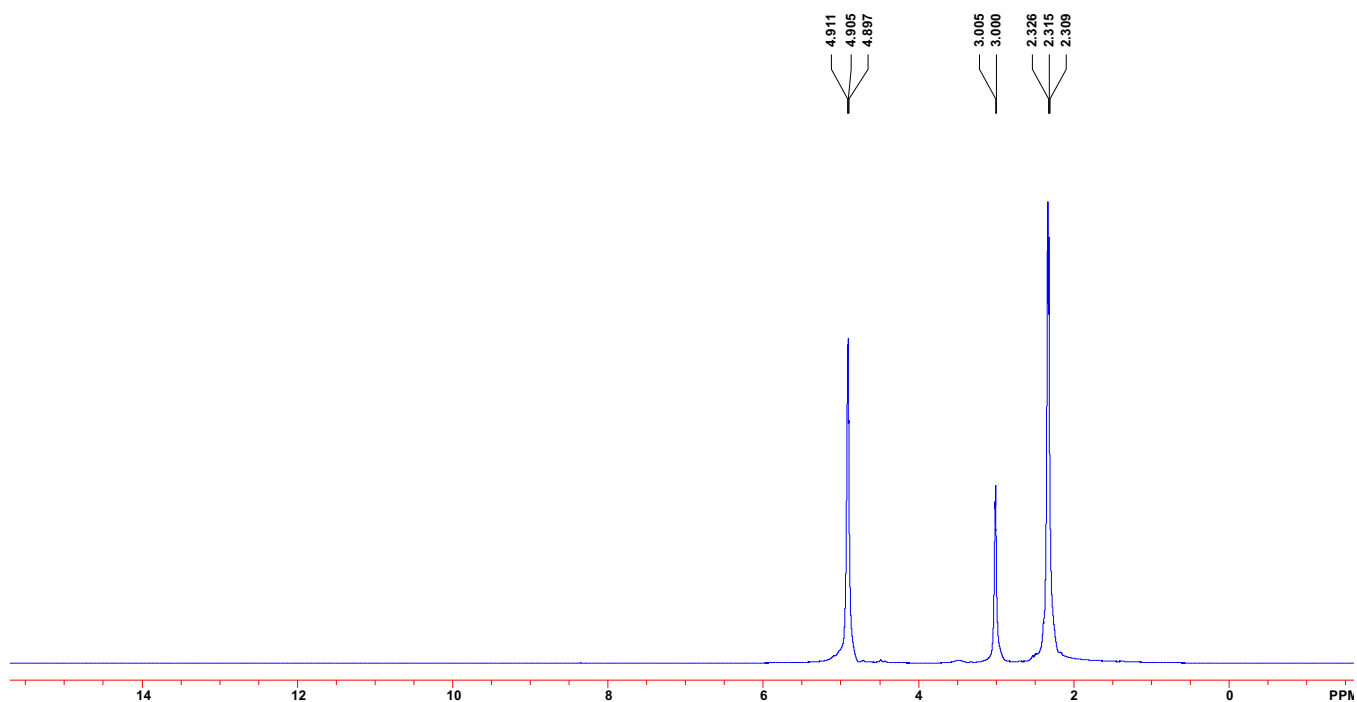

**Figure S46.** <sup>1</sup>H NMR spectroscopy of propargyl acetate-1-<sup>13</sup>C **6b**

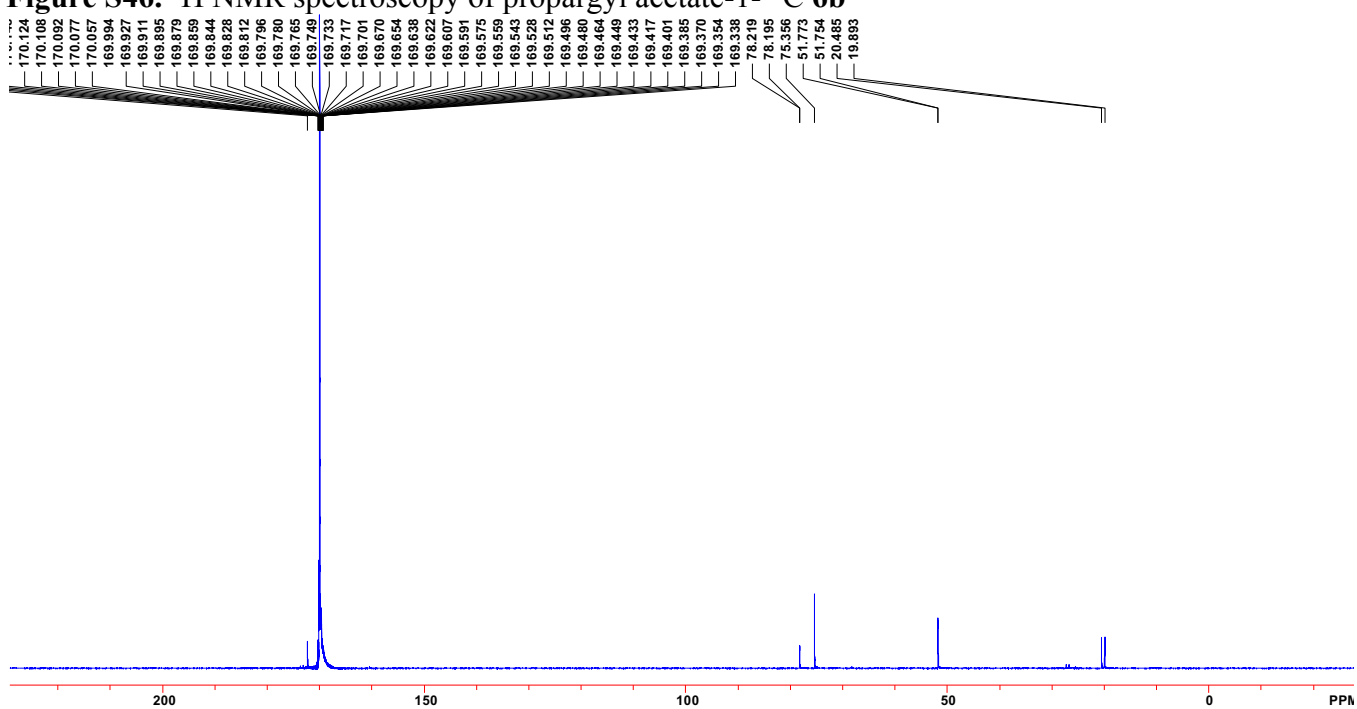

**Figure S47.** <sup>13</sup>C NMR spectroscopy of propargyl acetate-1-<sup>13</sup>C **6b**

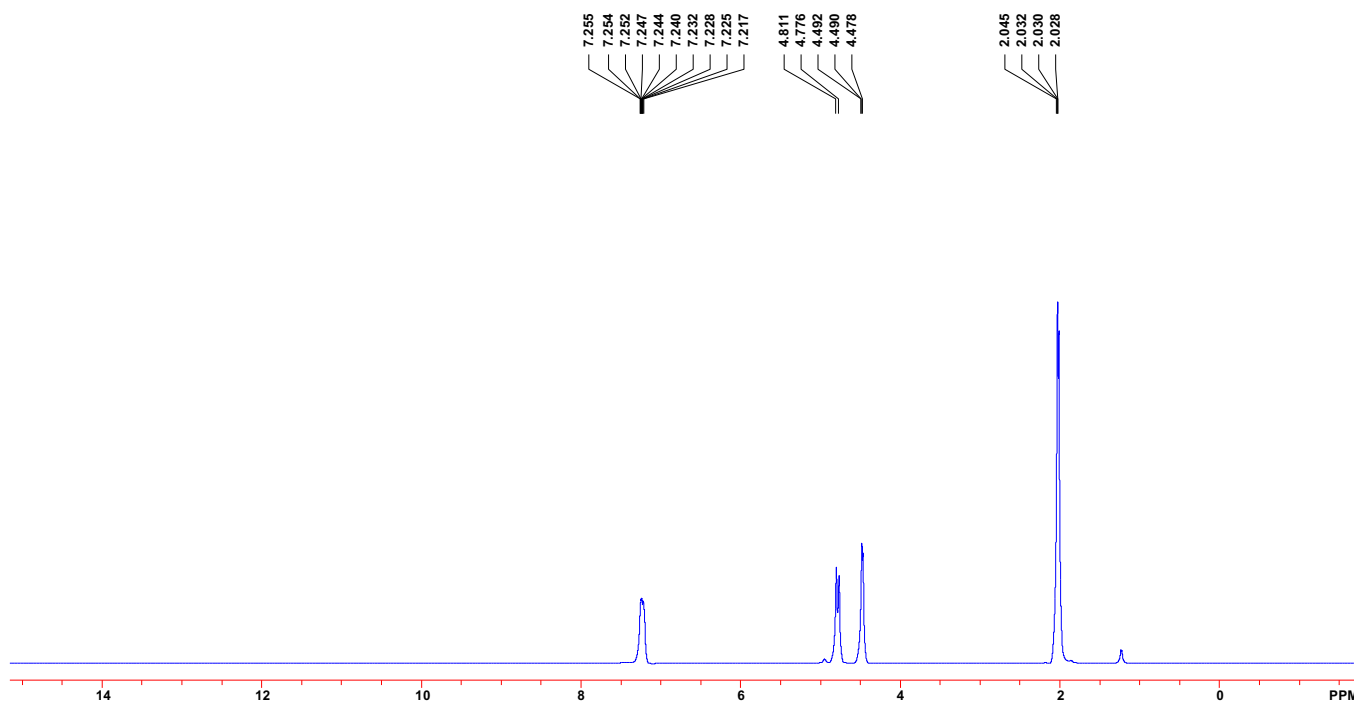

Figure S48.  $^1\text{H}$  NMR spectroscopy of vinyl acetate-1- $^{13}\text{C}$  **7b**

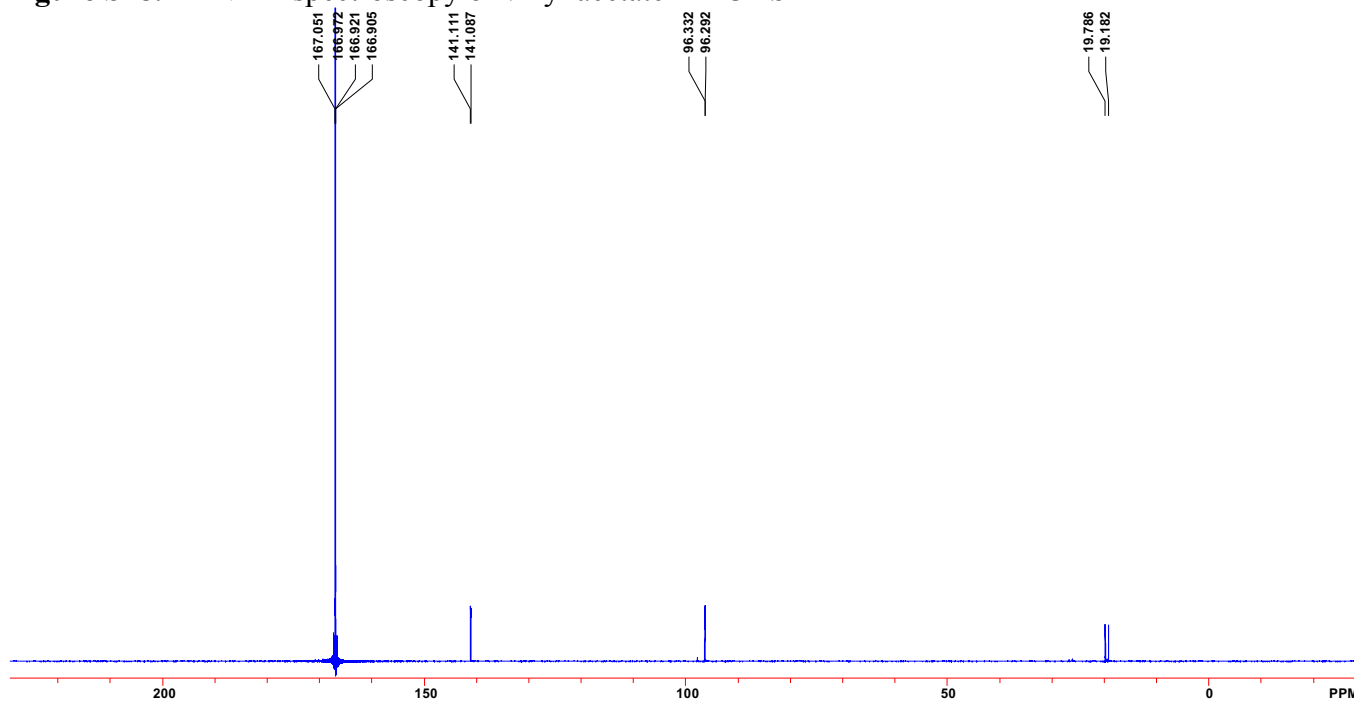

Figure S49.  $^{13}\text{C}$  NMR spectroscopy of vinyl acetate-1- $^{13}\text{C}$  **7b**

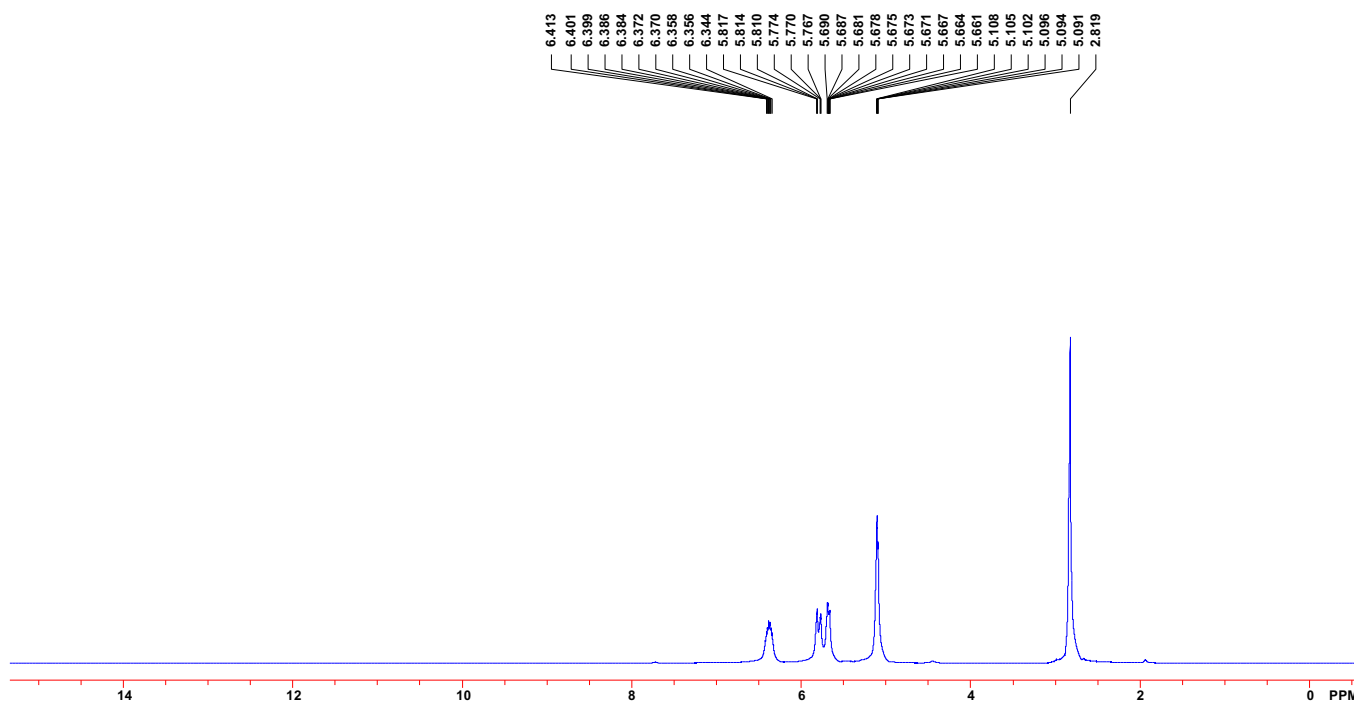

Figure S50.  $^1\text{H}$  NMR spectroscopy of allyl pyruvate **8a**

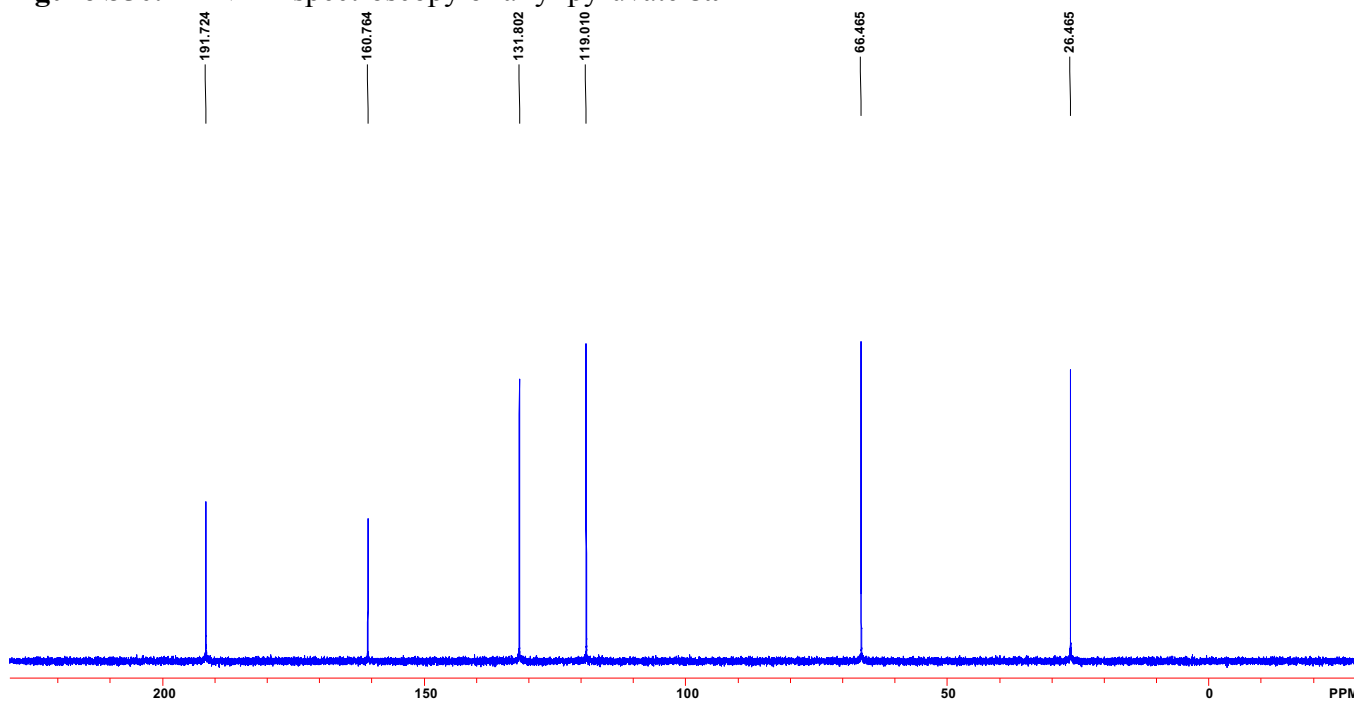

Figure S51.  $^{13}\text{C}$  NMR spectroscopy of allyl pyruvate **8a**

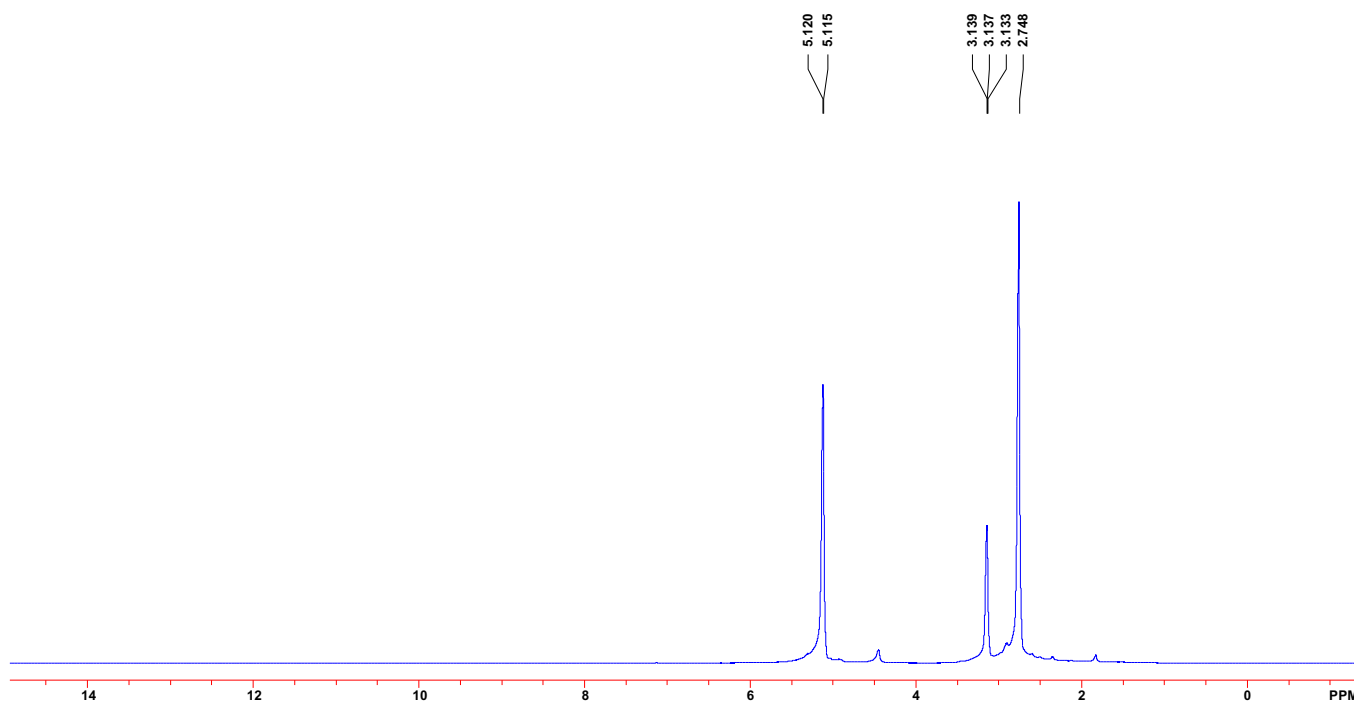

Figure S52. <sup>1</sup>H NMR spectroscopy of propargyl pyruvate **9a**

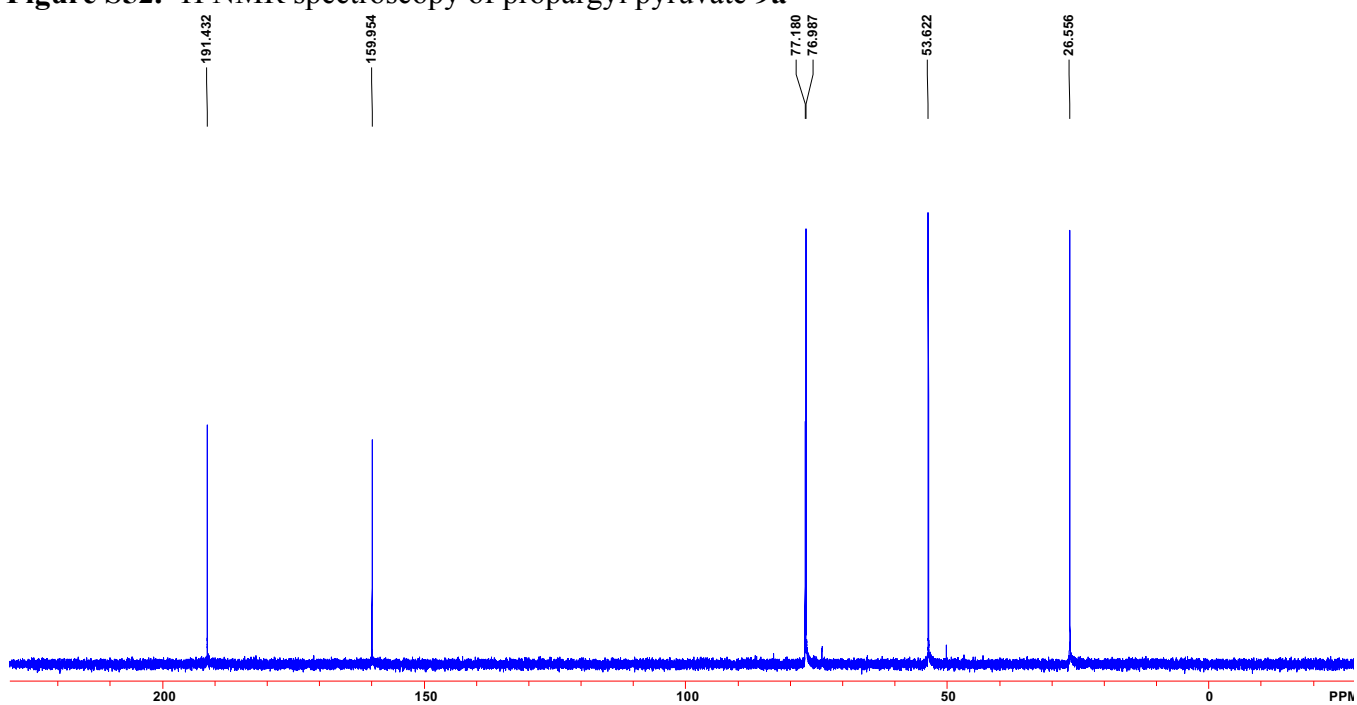

Figure S53. <sup>13</sup>C NMR spectroscopy of propargyl pyruvate **9a**

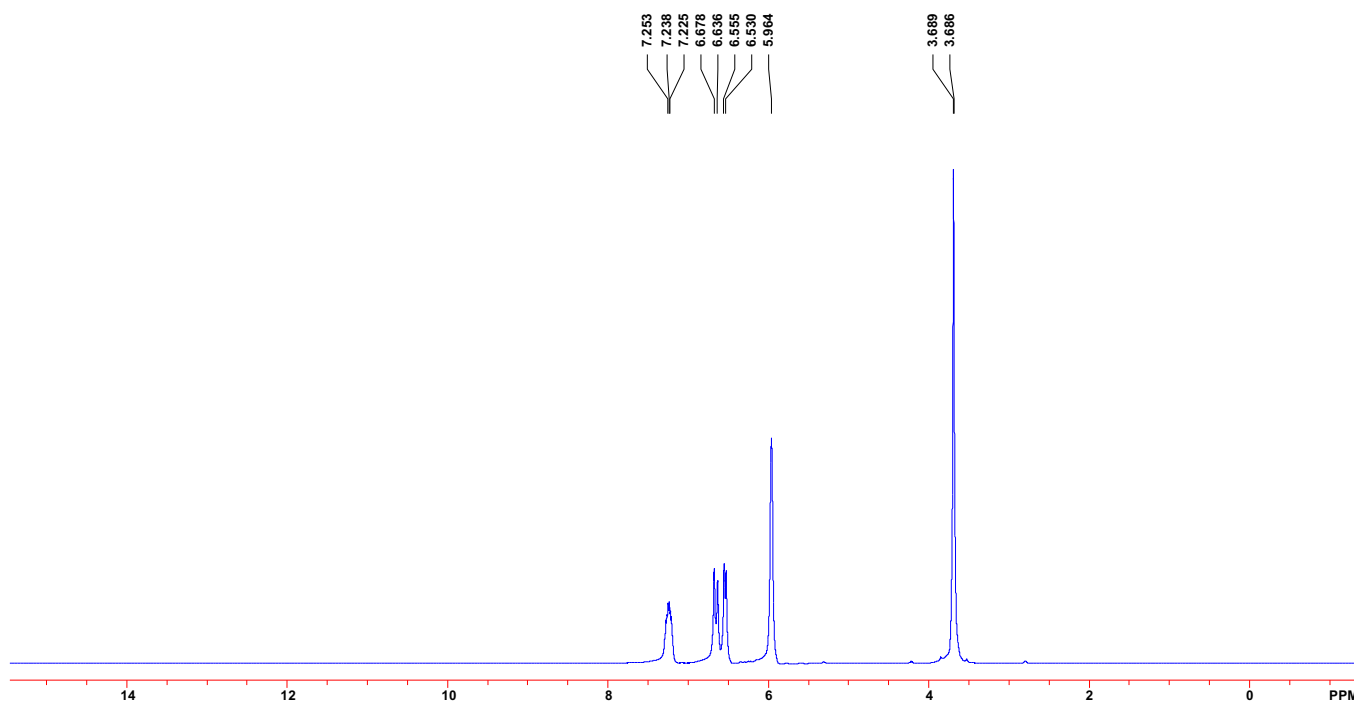

Figure S54.  $^1\text{H}$  NMR spectroscopy of allyl pyruvate-1- $^{13}\text{C}$  **8b**

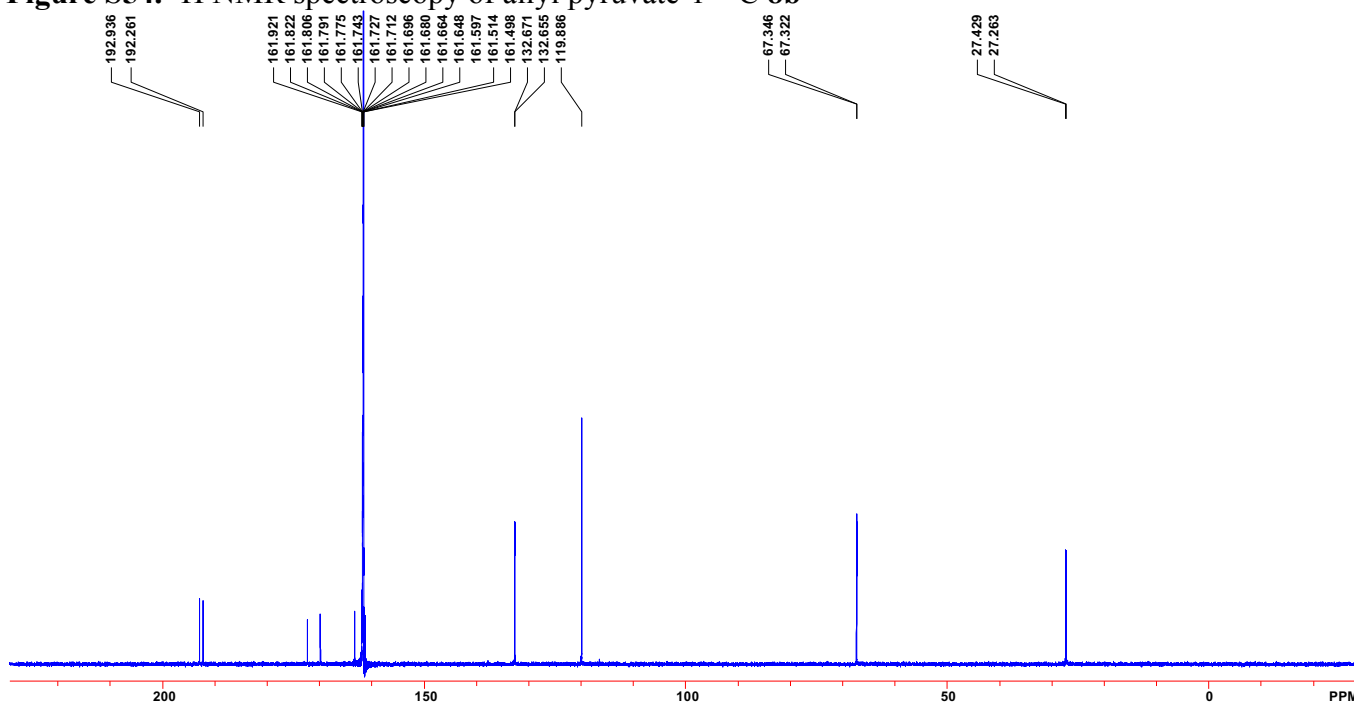

Figure S55.  $^{13}\text{C}$  NMR spectroscopy of allyl pyruvate-1- $^{13}\text{C}$  **8b**

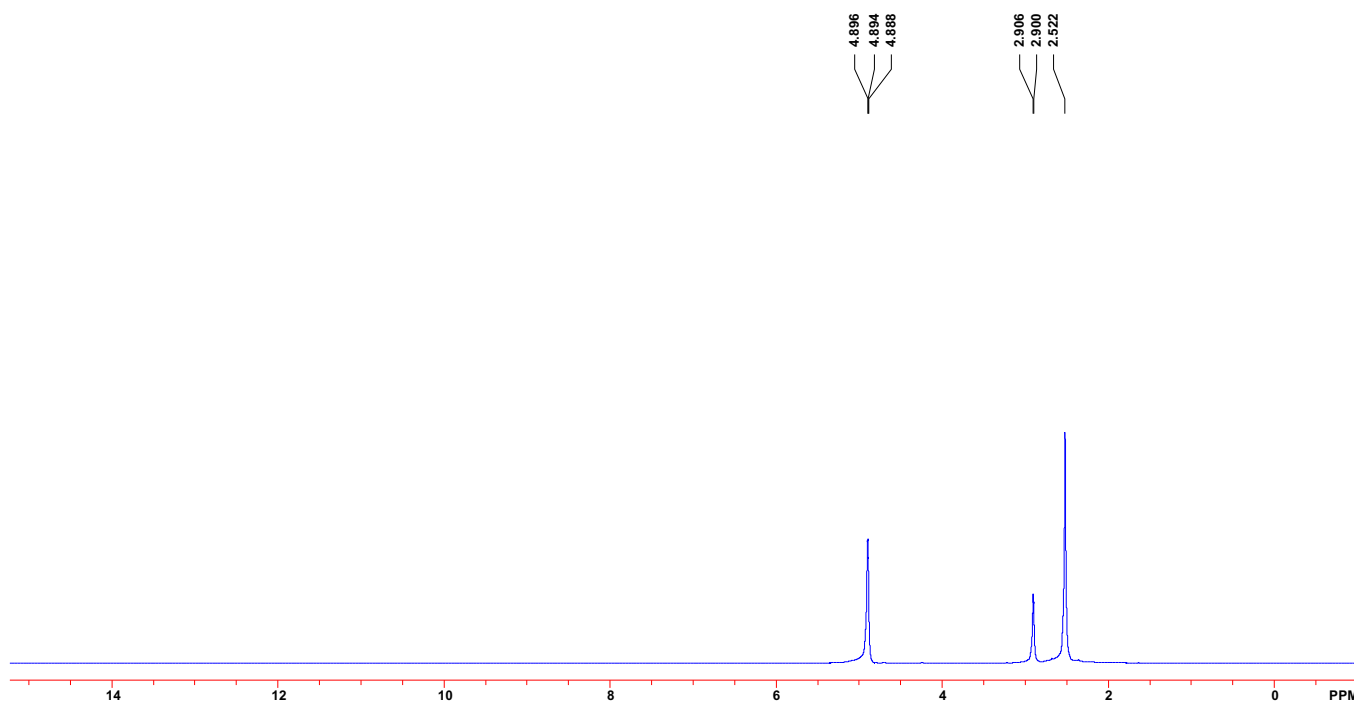

Figure S56. <sup>1</sup>H NMR spectroscopy of propargyl pyruvate-1-<sup>13</sup>C **9b**

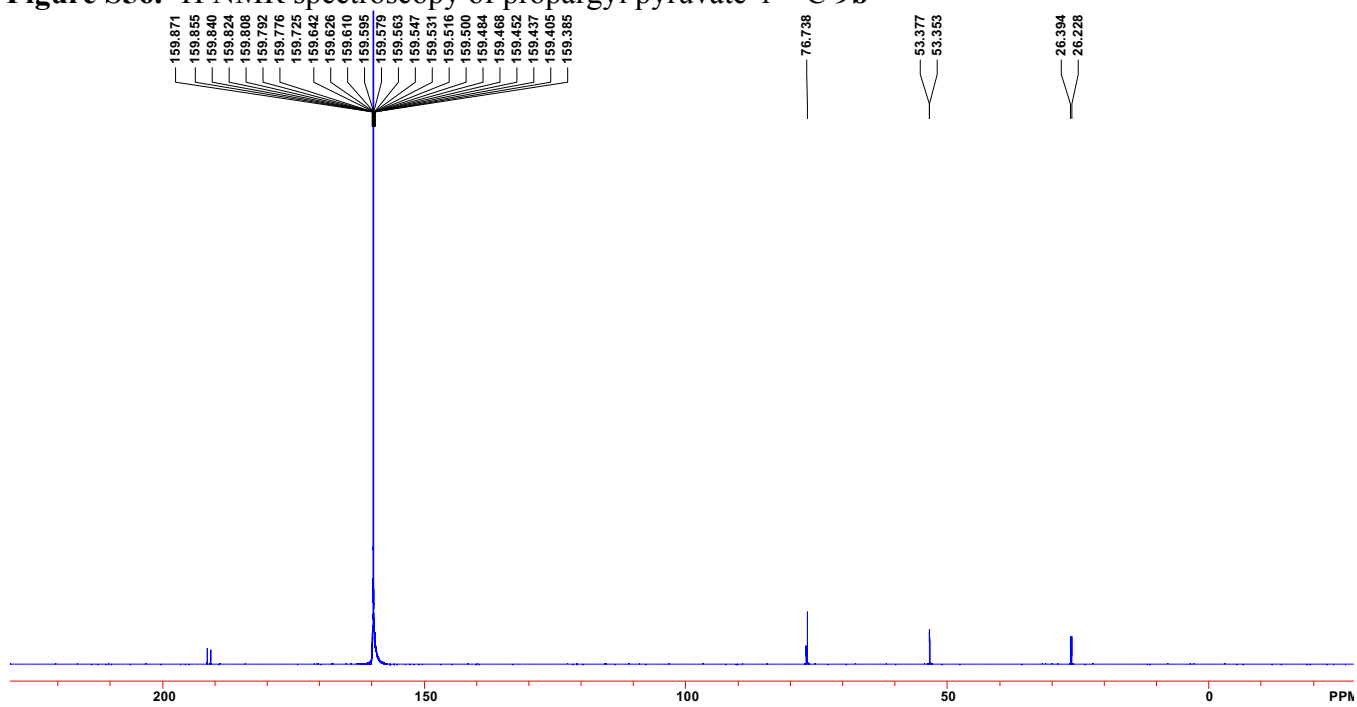

Figure S57. <sup>13</sup>C NMR spectroscopy of propargyl pyruvate-1-<sup>13</sup>C **9b**
